# Supplementary material
Source: publisher site journal article supplement (https://www.degruyterbrill.com/publication/journal_key/ZGRE/downloadAsset/ZGRE_Jahresregister%20ZGR%202018.pdf)
Supplement: Supplementary file 1 [file ZGRE_Jahresregister%20ZGR%202018.pdf]

**DE GRUYTER**

**2018 · BAND 47**

ISSN 0340-2479 · e-ISSN 1612-7048

# **ZEITSCHRIFT FÜR UNTERNEHMENS- UND GESELLSCHAFTSRECHT**

**HERAUSGEGEBEN von Alfred Bergmann, Holger Fleischer,  
Wulf Goette, Heribert Hirte, Peter Hommelhoff, Gerd Krieger, Hanno Merkt,  
Christoph Teichmann, Jochen Vetter, Marc-Philippe Weller, Hartmut Wicke**

## **ZEITSCHRIFT FÜR UNTERNEHMENS- UND GESELLSCHAFTSRECHT PEER REVIEWED JOURNAL**

BEGRÜNDET VON MARCUS LUTTER UND HERBERT WIEDEMANN

### **HERAUSGEBER**

Vorsitzender Richter am Bundesgerichtshof a.D. Professor Dr. Alfred Bergmann, Karlsruhe;  
Professor Dr. Dr. h.c. Holger Fleischer, LL.M., MPI Hamburg;  
Vorsitzender Richter am Bundesgerichtshof a.D. Professor Dr. Wulf Goette, Karlsruhe;  
Professor Dr. Heribert Hirte, LL.M., Universität Hamburg, MdB;  
Professor Dr. Dr. h.c. mult. Peter Hommelhoff (geschäftsführend), Universität Heidelberg;  
Rechtsanwalt Professor Dr. Gerd Krieger, Düsseldorf;  
Professor Dr. Hanno Merkt, LL.M., Universität Freiburg, Richter am OLG Karlsruhe;  
Professor Dr. Christoph Teichmann, Universität Würzburg;  
Rechtsanwalt Professor Dr. Jochen Vetter, München;  
Professor Dr. Marc-Philippe Weller, Universität Heidelberg;  
Notar Professor Dr. Hartmut Wicke, LL.M., München

**EHEMALIGE HERAUSGEBER** Rechtsanwalt und Notar Dr. Carl Hans Barz; Präsident des BGH Dr. Robert Fischer;  
Rechtsanwalt und Wirtschaftsprüfer Dr. Dr. h.c. Reinhard Goerdeler; Professor Dr. Dr. Dr. h.c. mult. Klaus J. Hopt; Professor Dr. Dr. h.c. mult. Marcus Lutter; Präsident des BGH Professor Dr. Walter Odersky; Notar Professor Dr. Hans-Joachim Priester; Professor Dr. Herbert Wiedemann

**VERANTWORTLICHER HERAUSGEBER** Professor Dr. Dr. h. c. mult. Peter Hommelhoff, Institut für Deutsches und Europäisches Gesellschafts- und Wirtschaftsrecht, Friedrich-Ebert-Platz 2, D-69117 Heidelberg, Fax: (06221) 54 76 14, [peter.hommelhoff@urz.uni-heidelberg.de](mailto:peter.hommelhoff@urz.uni-heidelberg.de)

**SCHRIFTFLEITER** Professor Dr. Hanno Merkt, Institut für ausländisches und internationales Privatrecht, Abt. II, Albert-Ludwigs-Universität Freiburg, Peterhof - Niemensstr. 10, D-79098 Freiburg, E-Mail: [Hanno.Merk@jura.uni-freiburg.de](mailto:Hanno.Merk@jura.uni-freiburg.de)

**JOURNAL MANAGER** Jana Kuchta, De Gruyter, Genthiner Straße 13, 10785 Berlin, Germany, Tel.: +49 (0)30 260 05-228, Fax: +49 (0)30 260 05-250, E-Mail: [jana.kuchta@degruyter.com](mailto:jana.kuchta@degruyter.com)

**ANZEIGENVERANTWORTLICHE** Claudia Neumann, De Gruyter, Genthiner Straße 13, 10785 Berlin, Germany, Tel.: +49 (0)30 260 05-226, Fax: +49 (0)30 260 05-264, E-Mail: [anzeigen@degruyter.com](mailto:anzeigen@degruyter.com)

Die Zeitschrift und alle in ihr enthaltenen einzelnen Beiträge und Abbildungen sind urheberrechtlich geschützt. Das gilt auch für die veröffentlichten Leitsätze, denn diese sind geschützt, soweit sie vom Einsender oder von der Schriftleitung erarbeitet oder redigiert worden sind. Jede Verwertung außerhalb der engen Grenzen des Urheberrechtsgesetzes ist ohne Zustimmung des Verlages unzulässig und strafbar. Das gilt insbesondere für Vervielfältigungen, Übersetzungen, Mikroverfilmungen und die Einspeicherung und Verarbeitung in elektronischen Systemen. Fotokopien für den persönlichen und sonstigen eigenen Gebrauch dürfen nur von einzelnen Beiträgen oder Teilen daraus als Einzelkopien hergestellt werden. Jede im Bereich eines gewerblichen Unternehmens hergestellte oder benutzte Kopie dient gewerblichen Zwecken gem. § 54 (2) UrhG und verpflichtet zur Gebührenzahlung an die VG WORT, Abteilung Wissenschaft, Goethestraße 49, D-80336 München, von der die einzelnen Zahlungsmodalitäten zu erfragen sind.

ISSN 0340-2479 · e-ISSN 1612-7048

Alle Informationen zur Zeitschrift, wie Hinweise für Autoren, Open Access, Bezugsbedingungen und Bestellformulare, sind online zu finden unter [www.degruyter.com/journals/zgr](http://www.degruyter.com/journals/zgr)

© 2018 Walter de Gruyter GmbH, Berlin/Boston

**SATZ** Jürgen Ullrich typesatz, Nördlingen

**DRUCK** Franz X. Stickle Druck und Verlag e.K., Ettenheim

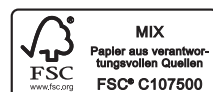

# Inhaltsverzeichnis

|                                                                                                                                                                                                                                 |     |
|---------------------------------------------------------------------------------------------------------------------------------------------------------------------------------------------------------------------------------|-----|
| BACHMANN, GREGOR: CSR-bezogene Vorstands- und Aufsichtsratspflichten und ihre Sanktionierung . . . . .                                                                                                                          | 231 |
| BEHR, MARTIN/SCHILD, MARC/FOLLERT, FLORIAN: Die Abgrenzung von Eigen- und Fremdkapital im kapitalmarktorientierten Jahresabschluss – Eine Analyse unter besonderer Berücksichtigung von Nicht-Kapitalgesellschaften – . . . . . | 735 |
| BEUTHIEN, VOLKER: Was dem einen sein Ideal, ist dem anderen sein Geschäft – Zur Grundordnung des Vereinsrechts – . . . . .                                                                                                      | 1   |
| BEZZENBERGER, TILMAN: Die derivative Haftungsklage der Aktionäre – Deutsches und US-amerikanisches Recht – . . . . .                                                                                                            | 584 |
| BINDER, JENS-HINRICH: Der Aufsichtsrat von Kreditinstituten drei Jahre nach dem „Regulierungstsunami“ – eine Bestandsaufnahme . . . .                                                                                           | 88  |
| BRELLOCHS, MICHAEL: Zur Angemessenheit der Gegenleistung im Übernahmerecht – Besprechung von BGH, Urt. v. 7.11.2017 – II ZR 37/16 (McKesson/Celesio) – . . . . .                                                                | 811 |
| FLEISCHER, HOLGER: Unternehmensinteresse und intérêt social: Schlüsselfiguren aktienrechtlichen Denkens in Deutschland und Frankreich                                                                                           | 703 |
| FLUME, JOHANNES W.: Rechtsgeschäftslehre und Kompetenzverteilung in der Aktiengesellschaft – Zugleich Besprechung der Entscheidung BGH NZG 2018, 629 – . . . . .                                                                | 928 |
| FOLLERT, FLORIAN/SCHILD, MARC/BEHR, MARTIN: Die Abgrenzung von Eigen- und Fremdkapital im kapitalmarktorientierten Jahresabschluss – Eine Analyse unter besonderer Berücksichtigung von Nicht-Kapitalgesellschaften – . . . . . | 735 |
| HARBARTH, STEPHAN: Aktienrecht, Gemeinwohl und Vergütungsparameter . . . . .                                                                                                                                                    | 379 |
| HENNRICHS, JOACHIM: Die Grundkonzeption der CSR-Berichterstattung und ausgewählte Problemfelder . . . . .                                                                                                                       | 206 |
| HÜBNER, LEONHARD: Eine Rom-VO für das Internationale Gesellschaftsrecht – zugleich ein Beitrag zur Kohärenz im Internationalen Gesellschaftsrecht – . . . . .                                                                   | 149 |
| HUMBERT, FRANZISKA: Corporate Social Responsibility und die Frage nach staatlicher Regulierung: Eine rechtspolitische Einschätzung . .                                                                                          | 295 |
| HUPKA, JAN: Pflichtangaben in Hauptversammlungsniederschriften und deren Berichtigung – Anmerkung zu BGH, Urt. v. 10.10.2017, II ZR 375/15 – . . . . .                                                                          | 688 |
| KÖNEN, DANIEL: Die vereinsrechtliche Rechtsformkontrolle unter besonderer Berücksichtigung des § 43 BGB . . . . .                                                                                                               | 632 |
| KRAJEWSKI, MARKUS: Legitimationsfragen internationaler Rahmenwerke für die CSR-Berichterstattung: Inhalt, Regelgeber und Durchsetzungsmechanismen . . . . .                                                                     | 271 |
| LIEDER, JAN: Unternehmerische Entscheidungen des Aufsichtsrats . . . .                                                                                                                                                          | 523 |

|                                                                                                                                                                                                                                 |     |
|---------------------------------------------------------------------------------------------------------------------------------------------------------------------------------------------------------------------------------|-----|
| MANSEL, HEINZ-PETER: Internationales Privatrecht de lege lata wie de lege ferenda und Menschenrechtsverantwortlichkeit deutscher Unternehmen . . . . .                                                                          | 439 |
| MOCK, SEBASTIAN: Die Geltendmachung der Geschäftsführerhaftung durch die Kommanditisten bei der GmbH & Co. KG – Besprechung von BGH, Urt. v. 19.12.2017 – II ZR 255/16, NZG 2018, 220 – . . . . .                               | 796 |
| MÜLLER, HANS-FRIEDRICH: Sanierung nach der geplanten EU-Restrukturierungs-Richtlinie – Eine Analyse aus gesellschaftsrechtlicher Perspektive – . . . . .                                                                        | 56  |
| MYLICH, FALK: Die atypisch stille Beteiligung als ergänzender Geschäftsanteil . . . . .                                                                                                                                         | 867 |
| PÖSCHKE, MORITZ: Wahlrechte und „Ermessensspielräume“ im Bilanzrecht und die Business Judgement Rule . . . . .                                                                                                                  | 647 |
| RAWERT, PETER: Die Stiftung als Familiengesellschaft (?) – Zur Virtualisierung gesellschaftsrechtlicher Strukturen durch das Stiftungsrecht – . . . . .                                                                         | 835 |
| RÜHMKORF, ANDREAS: Corporate Social Responsibility in der Lieferkette: Governance und Verantwortlichkeiten . . . . .                                                                                                            | 410 |
| SCHALL, ALEXANDER: Die Mutter-Verantwortlichkeit für Menschenrechtsverletzungen ihrer Auslandsstöchter . . . . .                                                                                                                | 479 |
| SCHAPER, MARTIN: Eigene Anteile im Formwechsel . . . . .                                                                                                                                                                        | 126 |
| SCHILD, MARC/FOLLERT, FLORIAN/BEHR, MARTIN: Die Abgrenzung von Eigen- und Fremdkapital im kapitalmarktorientierten Jahresabschluss – Eine Analyse unter besonderer Berücksichtigung von Nicht-Kapitalgesellschaften – . . . . . | 735 |
| SCHOLLMAYER, EBERHARD: Von der Niederlassungsfreiheit zur Rechtswahlfreiheit? Das „Polbud“-Urteil des Europäischen Gerichtshofs vom 25. Oktober 2017 . . . . .                                                                  | 186 |
| SIMONS, CORNELIUS: Corporate Social Responsibility und globales Wirtschaftsrecht. . . . .                                                                                                                                       | 316 |
| SPINDLER, GERALD: Gesellschaftsrecht und Digitalisierung . . . . .                                                                                                                                                              | 17  |
| VETTER, JOCHEN: Geschäftsleiterpflichten zwischen Legalität und Legitimität . . . . .                                                                                                                                           | 338 |
| ZWIRLEIN, SUSANNE: Minimalinvasive Maximallösung für pseudo-englische Kapitalgesellschaften – Der Referentenentwurf eines Vierten Gesetzes zur Änderung des Umwandlungsgesetzes – . . . . .                                     | 900 |

# Sachregister

## Abberufung von Vorstandsmitgliedern

- Abberufungsermessen 541 f, 544, 581
- unternehmerische Entscheidung des Aufsichtsrats 540, 543 ff, 581
- Vertrauensentzug durch Hauptversammlung 544 f
- wichtiger Grund 542

## Abschlussprüfer

- Prüfung der CSR-Berichterstattung 220 ff, 314

## actio pro socio bei GmbH & Co. KG

- Anwendbarkeit des Kapitalgesellschaftsrecht, sonstige gesetzgeberische Sonderregelungen 806 f
- Beschränkung auf Sozialansprüche, Entgegenstehen tatsächlicher Gegebenheiten 804 ff
- Durchbrechung der Beschränkung im Aktien- und Konzernrecht, Vergleichbarkeit 804 ff
- Erstreckung auf Geschäftsführerhaftung, Praktikabilitätserwägungen 807 f
- fehlende Anerkennung als Einheitsverband 806 ff
- fehlende Rechtsunsicherheit hinsichtlich des tatsächlichen Bestehens der Prozessführungsbefugnis 800
- fehlende Störung der gesellschaftsinternen Zuständigkeitsregeln 803
- fehlende Übertragbarkeit der Beschränkung auf Sozialansprüche 802 ff
- fehlendes Freistellungserfordernis des Gesellschafters von gesellschaftsinternen Streitigkeiten 803
- Fremdgeschäftsführer, Durchsetzung von Drittansprüchen 800
- Grundsätze der Beschränkung auf Sozialansprüche 798 ff, *s.a. Prozessführungsbefugnis bei der actio pro socio*
- materiell-rechtliche Verankerung des Geschäftsführers in der KG 807
- Missbrauchsrisiko bei Geldendmachung von Organhaftungsansprüchen durch Kommanditisten 809 f
- Problem der Haftungsdurchsetzung bei Bestehen eines Beirats 808 f
- Prozessführungsbefugnis *s. Prozessführungsbefugnis bei der actio pro socio*
- virtueller Verband, Übertragung der Entwicklungen 809

## action en complément du passif 509

## aiding and abetting-Fälle 483

## Aktiengesellschaft

- Erwerb eigener Anteile 127
- Formwechsel einer GmbH in eine AG 132 f
- Formwechsel einer Personengesellschaft in eine AG 133 f
- Formwechsel, Halten eigener Anteile 129 ff, *s.a. eigene Anteile im Formwechsel*
- Formwechsel, Mitteilungspflichten 136 f, 147
- Formwechsel, Veräußerungspflichten nach Durchführung 134 f, 147
- Formwechsel, Zulässigkeit bei mittelbar gehaltenen eigenen Anteilen 130 ff, 147
- Formwechsel, Zulässigkeit bei unmittelbar gehaltenen eigenen Anteilen 129 f, 147
- Gemeinwohlbelange, Berücksichtigung 341 ff, *s.a. Geschäftsleiterpflichten und CSR-Belange*
- Gemeinwohlbindung 341, 350 ff
- intérêt social *s. dort*
- Kommunikationsform zwischen den Organen einer AG 31
- Kompetenzverteilung 930 ff
- nichtfinanzielle Vergütungsparameter für CSR-Ausrichtung 380 ff, *s.a. CSR-Vergütungsparameter, nichtfinanzielle*
- organschaftliche Vertretungsmacht des Aufsichtsrats 930 ff, *s.a. organschaftliche Vertretungsmacht und Aufsichtsrat*
- Unternehmensinteresse *s. dort*
- Unzulässigkeit eine atypisch stillen Beteiligung 879 ff, 898
- virtuelle Aufsichtsratssitzung 28 f
- virtuelle Hauptversammlung 25 ff
- virtuelle Vorstandssitzung 30
- Zeichnung eigener Aktien bei Formwechsel 129

## Aktienrecht

- Durchbrechung der Beschränkung der actio pro socio auf Sozialansprüche 804
- MitbestG 1976 716
- Reform des deutschen Aktienrechts 1965 714
- Unternehmensinteresse und intérêt social, vergleichende Dogmengeschichte 705 ff, 731 ff

## Aktionär

- Digitalisierung, Recht auf Gleichbehandlung 32 f

- Kommunikation, Anforderungen nach DSGVO 34 ff, *s.a.* DSGVO
- Aktionärs-Haftungsklage** *s. derivative Haftungsklage der Aktionäre*
- Algorithmen**
  - selbst-lernende 19, 23 f, 43
- Angemessenheit der Gegenleistung im Übernahmerecht**
  - Ansprüche des das Pflicht-/Übernahmeangebot annehmenden Aktionärs 817 f
  - Ansprüche des das Pflicht-/Übernahmeangebot nicht annehmenden Aktionärs 818
  - Auslegung der Preisregeln 822 ff, 827, 832
  - Auslegungsunsicherheit bei Preisregeln 828 f
  - Berechnung bei Wandelanleihen und Optionen 829 f
  - derivativer Erwerb von Wandelanleihen 823
  - Durchsetzung durch Aktionäre 815 ff
  - freiwilliges Übernahmeangebot 814
  - gesetzliche Regelung 813 f
  - McKesson/Celesio-Entscheidung 813, 821 ff, 826 ff
  - Paketzuschläge 819 f
  - Pflichtangebot 813
  - Preisfestlegung durch Bieter 822 ff, 832
  - Prüfung durch die BaFin 820, 832
  - Rechtssicherheit 824 f, 832
  - Schutzinstrument 813
  - Spruchverfahren 819
  - Umgehungsschutz 822 ff, 832
  - unterlassenes Pflichtangebot 816
  - Vereinbarungen mit mehraktigen Erwerbsvorgang 821 ff, 832
  - vertraglicher Erfüllungsanspruch 817
  - Vor-, Parallel- und Nacherwerbe 814 f, 832
  - Vorgaben der Übernahme-RL 813 f
  - weite Auslegung des Begriffs „Vereinbarung“ 822 ff
- Anteile**
  - eigene Anteile im Formwechsel *s. dort*
  - mit Pfandrecht belastete eigene, Formwechsel 143 ff, 148
- ARAG/Garmenbeck-Urteil** 588, 679
- CSR-Berichterstattung, Klagepflicht 242
- Arbeitnehmerbegriff**
  - unionaler 163 ff
- Asset Deal** 903
- atypisch stille Beteiligung**
  - Aktiengesellschaften, Unzulässigkeit 879 ff, 895, 898
  - Ausfallhaftung 885
  - Ausgleichs- und Abfindungsregelungen 889 f
  - Begriff 871
  - Beteiligung am gesamten Unternehmensergebnis 879
  - Betreiben bestimmter Unternehmenssparten 897 f
  - Einkünfte aus Gewerbebetrieb 873
  - Einordnung als ergänzender Geschäftsanteil 873 ff, 898
  - Einordnung im Steuerrecht 872 ff, 895 f
  - Einzelkaufmann 894
  - fehlenden dogmatischen Fundierung 874
  - GmbH 882 ff, 898
  - Gründe 871
  - Haftung für Altverbindlichkeiten 893
  - Haftungsgleichsetzung mit Kommanditisten 891, 895
  - Haftungsgleichsetzung mit nicht eingetragenen Kommanditisten 892 f, 895
  - Innengesellschaft 871, 878
  - Kapitalerhöhung, besondere Form 882
  - Kapitalschutzregeln 874
  - Kontroll-, Informations-, Zustimmungs- und Beteiligungsbefugnisse 876, 878 f, 881, 886
  - mehrgliedriges Gesellschaftsverhältnis 874
  - Mitunternehmerinitiative 872 f
  - Mitunternehmerisiko 872 f
  - OHG, Haftungsfragen 893
  - Personengesellschaft 890 ff, 899
  - Publizitätsvermeidung 871
  - Rechte bei Umwandlung 889
  - Stellung bei Kapitalerhöhung 887 f
  - stiller Verband 874, 896 f
  - Teilnahme am Kapitalschutz 883 ff, 895
  - Teilnahme an Gesellschafterversammlung 885
  - Teilnahme an Kapitalaufbringung 884
  - Teilnahme an Kapitalerhaltung 883 f
  - Treuepflichten 886
  - Übertragbarkeit 886 f
  - Vererblichkeit 886 f
  - Verhältnis von Kommanditist und stillem Gesellschafter 875
  - Verhältnis zum Genussrechtsinhaber 877
  - Verhältnis zum stimmrechtslosen Gesellschafter 876 f
  - verhältnismäßige Beteiligung bei Kapitalerhöhung 887 f
  - Vertrag zur stillen Gesellschaft 877, 879, 886, 899 f
  - Voraussetzungen der Einordnung 872 ff
  - zweigliedriges Einlageverhältnis 874

**Aufsichtsrat**

- Abberufung von Vorstandsmitgliedern 540 ff, 581, *s.a. dort*
- Angemessenheit der Informationsgrundlage 554 ff, 582
- auftragsrechtlichen Entschädigungspflicht 932
- Bedeutung der organschaftliche Vertretungsmacht 934 f
- Beschlussfassung, Mehrheitsrechtsgeschäft oder Organrechtsakt 940
- Boardisierung 397 ff, 409
- Business Judgment Rule 525 ff, 580 ff, 653 *s.a. dort*
- CSR-bezogene Prüfungs- und Rechenschaftspflicht 240
- CSR-bezogene Überwachungs- und Beratungspflicht 240 f
- CSR-fördernde Personal- und Vergütungsentscheidungen 243
- CSR-Konzept, zustimmungsvorbehaltspflichtig/-pflichtig 241
- CSR-Pflichten und Business Judgment Rule 243
- Entsprechenserklärung 552 ff, 581 f, *s.a. dort*
- Feststellung/Billigung von Jahres-/Konzernabschlüssen, Wahlrechte und Ermessensspielräume 652 f
- Freiheit von Interessenkonflikten 568 ff 570 ff, 583
- Gemeinwohlbelange, Einfluss- und Kontrollmöglichkeiten 374 f, 377 f
- Handeln auf Grundlage angemessener Informationen 554 ff, 582
- Handeln auf Grundlage externer Beratung 564 ff, 582
- Handeln zum Wohl der Gesellschaft 545, 576 ff, 583
- historisch-aktienrechtliche Entwicklung der organschaftlichen Vertretung 932 ff
- Informationsbeschaffungspflicht 558 f
- nichtfinanzielle Vergütungsparameter für CSR-Ausrichtung 396 ff, 401 f, *s.a. CSR-Vergütungsparameter, nichtfinanzielle*
- Organrechtsfähigkeit 931
- organschaftliche Gesamtvertretung 941 ff
- organschaftliche Vertretungsmacht 930 ff
- Organtheorie 936 ff
- Präsenzsitzung 28 ff
- Prüfung der CSR-Berichterstattung 222 ff
- Prüfungs- und Nachforschungspflicht 562 f
- rechtsgeschäftlicher Erklärungsvertreter 942 f
- strukturelles Informationsdefizit 559 f

- Überwachungsfunktion 524 ff
  - unternehmerische Entscheidungen 533 ff, 580 f, *s.a. Unternehmerische Entscheidungen des Aufsichtsrats*
  - unternehmerischer Handlungsspielraum 527 f, 543, 545, 550 f, 553
  - unternehmerisches Ermessen 525 f, 536 ff
  - Vertretertheorie 935 ff
  - virtuelle Sitzung 28 ff
  - Vorstandsvergütungsentscheidungen 545 ff, 581, *s.a. Vorstandsvergütung*
  - Willensausübung 940
  - Willensbildung 939 f, 942
  - Zurechnungsmodelle organschaftlichen Handelns 935 ff
  - Zustimmungsvorbehalte 535 ff, 581, *s.a. dort*
- Aufsichtsrat von Kreditinstituten**
- aktienrechtlicher Bezugsrahmen 98 f
  - Anforderungen des § 25 d KWG, Umsetzungsprobleme 89 ff
  - angemessene Ressourcen für Mandatsarbeit 113 ff
  - angemessener Zeitaufwand für Mandatsarbeit 113 ff
  - Ausnahmestrukturmodell von der gesellschaftsrechtlichen Grundkonzeption 90, 120 ff
  - Ausschussbildung, Überlagerung des Aktienrechts durch Aufsichtsrecht 116 ff
  - Ausschussbildung, Vorgaben 115 ff
  - Auswahl von Organwaltern 99 ff
  - Bestandsaufnahme nach Neuregelungen 88 ff
  - CEBS-Leitlinien 92 f
  - CRD IV-Umsetzung 97, 99 ff
  - EBA-Leitlinien 92 f, 125
  - Fachkenntnis, erforderliche 102
  - Finanzkrise, Auswirkungen 89 ff
  - guter Leumund 105
  - Informationsversorgung 119 f
  - Inkompatibilitätsregeln 111 ff
  - kollektive Organqualifikation 107 f
  - Leitungsorgan, rechtsoffene Formulierung 96
  - Mandatsbeschränkungen 111 ff
  - MaRisk 93
  - Merkblatt zu den Mitgliedern von Verwaltungs- und Aufsichtsorganisationen gemäß KWG und KAGB 93
  - Organisationsverfassung 95 ff
  - praktische Erfahrung 103
  - Qualifikation, Überlagerung des Aktienrechts durch Aufsichtsrecht 108 ff
  - Qualifikationsanforderungen 95, 99 ff
  - Regelungsgegenstände des § 25 d KWG 95 f

- Sachkunde, erforderliche 99, 101 ff
- Sanktions- und Haftungsebene der aufsichtsrechtlichen Anforderungen 123 f
- Single Supervisory Mechanism (SSM) 93
- Trennung von Geschäftslitersaufgaben 97
- Überlagerungsverhältnis aufsichtsrechtlicher Vorgaben und aktienrechtliche Kompetenzordnung 121 f
- Umsetzung unionsrechtlicher Vorgaben 96 f
- Vergütungssysteme, Schranken 114
- Zulässigkeitsanforderungen 95
- Zusammensetzung 95 ff
- Zuverlässigkeit 99, 101, 105 f

### **Beteiligung**

- atypisch stille *s. dort*
- typisch stille *s. dort*

### **Big Data**

- Organhaftung 42 f

### **Bilanzrecht**

- Ansatzwahlrechte 656 f
- Aufstellung, Feststellung/Billigung von Abschlüssen und Business Judgment Rule 652 ff
- Auslegungsunsicherheiten 655, 673
- Bewertungswahlrechte 656 f
- Bilanzen, praktische Bedeutung 648 ff
- bilanzielle Abbildung, Entscheidungsspielraum 666, 669
- Bilanzierungsentscheidungen als unternehmerische Entscheidungen 671 ff, 681, 687
- bilanzpolitisches Gestaltungspotential 669
- Business Judgment Rule und Bilanzierungsentscheidungen 653 f, 671 ff, 678 ff, 681 ff
- Business Judgment Rule, maßgeblicher Zeitpunkt für Vorliegen der Tatbestandsvoraussetzungen 684 f
- durch Unsicherheit gekennzeichnete Entscheidungen 679 f
- Einblicksgebot als Grenze der Wahlrechtsausübung 658 ff
- Entscheidungen bei Rechtsunsicherheit 655, 673
- Ermessensspielräume 663 ff, 687
- Fremd- und Eigenkapital, Abgrenzung *s. Kapitalabgrenzung*
- Haftung bei unklarer Rechtslage 675
- Handeln auf Grundlage angemessener Informationen 682 f
- Handeln ohne Sonderinteresse 683 f
- Informationsgrundlage, Anforderungen 682 f

- Informationsvermittlung des IFRS-Konzernabschlusses 747 ff
- Interessenkonflikte 683 f
- International Financial Reporting Standards (IFRS) 735 ff, *s.a. Kapitalabgrenzung*
- Jahresabschluss *s. dort*
- Kapitalabgrenzung *s. dort*
- Legal Judgment Rule 675 ff
- Normzweck als Grenze der Wahlrechtsausübung 657 f
- objektiv, rechtswidrige Bilanzierungsentscheidungen 675 ff, 686
- Personengesellschaften, Besonderheiten 755 ff
- planmäßige Abschreibung 665 f
- Prognosecharakter von Entscheidungen 679 f
- Sachverhaltsgestaltung 667 f
- Schätzungs- und Prognosespielräume 663 ff, 673, 687
- Stetigkeitsgebot als Grenze der Wahlrechtsausübung 661 f
- true and fair view-Prinzip 658 ff
- Wahlrechte, ausdrückliche 656 f, 673, 687
- Wahlrechtsausübung, Grenzen 657 ff
- Zukunftsbezogenheit von Entscheidungen 679 f

### **Blockchain**

- Angriffsszenarien 46
- Anwendungsfelder im Gesellschaftsrecht 49 ff
- Anwendungsgrenzen 48
- Datenschutzprobleme 48 f
- Decentralized Autonomous Organisation (DAO) 51 f
- Einsatz bei Gesellschaftsverträgen 49 f
- Einsatz bei Rechnungslegung 51
- Einsatz im Rahmen von Abstimmungen 50
- Grundlagen 44 ff
- Hash-Abbildungen 45 f
- Identifizierung und Verifizierung von Transaktionen 49 f
- Smart Contract 47
- Technologie 44 ff
- Unwiderruflichkeit der Transaktion 46
- Zeitstempel 45 f

### **Boardisierung** 397 ff, 409

### **Brexit**

- grenzüberschreitender Formwechsel 901 ff, *s.a. pseudo-englische Kapitalgesellschaft und Referentenentwurf eines Vierten Gesetzes zur Änderung des Umwandlungsgesetzes*

### **Bribery Act s. UK Bribery Act**

### **Business Judgment Rule** 353 f



- Angemessenheit der Informationsgrundlage 554 ff, 582, 682 f
- Aufsichtsratsentscheidungen 533 ff, *s.a. Unternehmerische Entscheidungen des Aufsichtsrats*
- Aufstellung, Feststellung/Billigung von Jahres-/Konzernabschlüssen 653 f
- Bilanzierungsentscheidungen 671 ff, 681 f, 687, *s.a. Bilanzrecht*
- CSR-Pflichten 237, 243
- durch Unsicherheit gekennzeichnete Entscheidungen 531 f, 536, 548, 551, 679 f
- Freiheit von Interessenkonflikten 568 ff, 583, 683 f
- Gesellschaftswohl 576 ff, 583
- Prognosecharakter von Entscheidungen 531 f, 536, 547, 551, 679 f
- Rechtsfolgen 679
- unternehmerische Entscheidungen 526 ff, 580 ff, 669 ff, 678 ff
- Zukunftsbezogenheit von Entscheidungen 679 f
- Business Registers Interconnection System (BRIS)** 21 f
- CEBS-Leitlinien** 2 f
- Centros-Entscheidung** 191, 194
- Claw-back-Klauseln** 401
- Cloudcomputing** 20
- Code de Commerce**
  - Article L. 225-102-4, Text und Übersetzung 474 ff
  - Article L. 225-102-5, Text und Übersetzung 477 f
  - Konzernhaftung für Menschenrechtsverstöße der Tochter-, Zulieferer- und Subunternehmen 444 f, 472
- Code of Conduct** 296, 359
- Cookies** 34, 37
- Corporate Citizen** 346
  - Anforderung und Grenzen 331 ff
  - CSR-Aktivitäten 329 ff
- Corporate Governance**
  - Deutscher Corporate Governance Kodex (DCGK) *s. dort*
- Corporate Social Responsibility (CSR)**
  - Anwendungsbereich 328 f
  - Aufsichtsratsvergütung 401 f
  - Begriff 273, 297, 317
  - Berichterstattung 206 ff, 271 ff, 309 ff *s.a. CSR-Berichterstattung*
  - Bilanz 296 ff
  - Business Judgment Rule 237, 243
  - Code of Conduct 296, 359
  - Corporate Citizen-Aktivitäten 329 ff
  - Costa Rica, ausbeuterische Verhältnisse auf Ananasplantagen 299
  - CSR-Belange 211 ff, *s.a. CSR-Berichterstattung*
  - CSR-Prägung eines Unternehmens 323 ff
  - CSR-Richtlinie (2014/95/EU) 309 ff, 354 ff, *s.a. CSR-Berichterstattung*
  - CSR-Standards, unzureichende Umsetzung 298 ff
  - CSR-Strategie der EU 301 ff
  - Delegationsfähigkeit und -verbot CSR-bezogener Pflichten 238 f
  - Deutscher Corporate Governance Kodex (DCGK) 317 f
  - Ecuador, Pestizideinsatz auf Bananenplantagen 300
  - Einfluss auf Entwicklung des Unternehmensinteresses 726 ff
  - Entwicklung 296 ff
  - ethisches Verhalten, Freiwilligkeit und Pflicht 339 ff, *s.a. Geschäftsleiterpflichten und CSR-Belange*
  - Freiwilligkeit 326 f
  - Geltungsbereich 328
  - Gemeinwohlbelange, Berücksichtigung 341 ff, *s.a. Geschäftsleiterpflichten und CSR-Belange*
  - Geschäftsleiterpflichten 338 ff, *s.a. Geschäftsleiterpflichten und CSR-Belange*
  - Good Company Ranking 380
  - „Green Washing“ 207, 226, 230
  - Haftungsmaßstab 325 f
  - haftungsrechtliche Folgen der Menschenrechtsverantwortung, Lösungsansätze im deutschen IPR *s. dort*
  - „hard“ law 275, 317, 321
  - Inhalt 326 ff
  - internationale Rahmenwerke 271 ff, *s.a. Internationale Rahmenwerke für CSR-Berichterstattung*
  - Kinderarbeit 289, 296, 427, 481 f
  - Lieferketten-Governance 410 ff, *s.a. dort*
  - Loi de vigilance 308
  - Menschenrechte 480 ff, *s.a. dort*
  - menschenrechtliche Sorgfaltpflicht 304 ff, 422 ff, *s.a. dort*
  - Menschenrechtsverantwortung 439 ff, *s.a. dort*
  - Menschenrechtsverletzung 480 ff, 513 f
  - Mutter-Verantwortlichkeit für Menschenrechtsverletzungen 479 ff, *s.a. dort*
  - nachhaltige Unternehmensentwicklung 385 ff

- Nationaler Aktionsplan (NAP) 304 ff, 447 ff, *s.a. dort*
- Pflichten der Gesellschaft 232 ff
- Pflichten des Aufsichtsrats 240 ff, *s.a. Aufsichtsrat*
- Pflichten des Vorstands 235 ff, *s.a. Vorstand*
- Rainforest Alliance 299 f
- Rana Plaza, Einsturz Textilfabrik 298
- Rechtsqualität 317 ff
- Rechtssicherheit 322 ff
- Regelbefolgung 322 f
- Reputationsmanagement 343 f, 408
- shareholder value-Ansatz 330, 360, 390 f
- „soft“ law 275, 334, 415
- Sozialnützlichkeit 329 ff
- stakeholder value-Ansatz 390 f
- Überforderung durch CSR-Belange 326 f
- Übergreifigkeit durch CSR-Belange 327
- UN-Leitprinzipien für Wirtschaft und Menschenrechte *s. dort*
- Vergütungsanreize, nichtfinanzielle 379 ff, *s.a. CSR-Vergütungsparameter, nichtfinanzielle*
- Vertrags-CSR 320
- Vorgeschichte 296 ff
- Vorstandsvergütung 396 ff
- CRD IV-Umsetzung** 97, 99 ff
- CSR-Berichterstattung**
  - Anfechtbarkeit von Beschlüsse 257
  - Anfechtbarkeit von Hauptversammlungsbeschlüssen 251 ff
  - Angaben zu wesentlichen Risiken 215, 219
  - Anwendungsbereich 209 f, 228, 310 f, 318
  - ARAG/Garmenbeck-Urteil 242
  - Begriffsbestimmung 273 f
  - Berechtigungsgrundlage für Berücksichtigung von Gemeinwohlbelangen 354 ff
  - Berichtspflicht der Gesellschaft 232 ff
  - Berichtspflicht des Vorstands 235 ff, *s.a. Vorstand*
  - Beschreibung angewandter Due Diligence-Prozesse 214 f, 219
  - Beschreibung verfolgter Konzepte und deren Ergebnisse 214 f, 219
  - Bilanzkontrolle durch DRP/BaFin 224 f, 245, 265
  - Bindungswirkung positiver CSR-Erklärung, fehlende 234 f
  - Business Judgment Rule 237, 243
  - Bußgelder und Kriminalstrafe 245 ff
  - CSR-Belange 211 ff
  - CSR-Richtlinie (2014/95/EU) 206 ff, 271 ff, 318 ff
  - CSR-RiLi-UG 206 ff, 309 f
  - Delegationsfähigkeit 238
  - Erforderlichkeit der Angaben 211, 214
  - Evaluations- und Monitoring-Verfahren 260
  - falscher CSR-Bericht, förmliche und formlose Sanktionsmöglichkeiten 258 f
  - fehlerhafte Entsprechenserklärung 251 ff
  - „Green Washing“ 207, 226, 230, 260 f
  - GRI Standards 213
  - Grundkonzeption 206 ff
  - „hard“ law 275, 317, 321
  - Informations- und Inhaltsmangel 254 f
  - internationale Rahmenwerke 271 ff, *s.a. Internationale Rahmenwerke für CSR-Berichterstattung*
  - Justiziabilität 219 ff, 229
  - Kernvorschrift 211, 274
  - kritische Bewertung 309 ff
  - Lagebericht über nichtfinanzielle Leistungsindikatoren, Überschneidung 216 ff, 229
  - Lieferketten-Governance 419 ff, *s.a. dort*
  - nichtfinanzielle Leistungsindikatoren 216 ff, 229, 311 f
  - ordnungswidriges Verhalten von Organmitgliedern 246
  - Pflichten des Aufsichtsrats 240 ff, *s.a. Aufsichtsrat*
  - Prüfung durch den Abschlussprüfer 220 ff, 229, 245, 314
  - Prüfung durch den Aufsichtsrat 222 ff, 229
  - Prüfungshandlungen 223
  - rechtspolitische Würdigung 225 ff
  - Regulierungssystematik 211 ff
  - Reichweite der Angaben 312 f
  - Sanktion, fehlendes Konzept 319
  - Sanktionsmechanismus bei unrichtigen Erklärungen 244 ff
  - „soft“ law 275, 334
  - soziale Sanktionen 244
  - Umfang der Berichtspflichten 212 f, 228
  - Umstände, für deren Verständnis CSR-Angaben erforderlich sind 212 f
  - Unilaterally Committed CSR 320
  - unvollständige Angaben, Auswirkung auf Jahresabschlüsse 225
  - Verbesserung des Sanktionsmechanismus 259
  - Veröffentlichungsvarianten 215 f
  - Vorstand, erklärendes Organ 210
  - „weiches“ und „hartes“ Recht 244, 265 ff, 275, 321
  - Wesentlichkeits-(Material)Martix 212 ff
  - Wesentlichkeitsbegriff 313

- Wirkungsmechanismus 209
- Zielsetzung 209, 228
- zivilrechtliche Haftung der Gesellschaft 247 ff
- zivilrechtliche Haftung von Organmitgliedern 249 f

#### **CSR-Richtlinie (2014/95/EU)**

- Berichterstattung 206 ff, 271 ff, 309 ff, 318 ff, 354 ff *s. a.* *CSR-Berichterstattung*
- Lieferketten-Governance 419 ff

#### **CSR-Vergütungsparameter, nichtfinanzielle**

- Anstellungsverträge von Vorständen 399, 408
- Aufsichtsrat, Gebot der Spiegelung des Pflichtenprogramms 396 f
- Aufsichtsrat, Verbot des Konterkarierens des Pflichtenprogramms 396
- Aufsichtsratsvergütung 401 f
- Boardisierung des Aufsichtsrats 397 ff
- Claw-back-Klauseln 401
- CSR-Orientierung 390 f
- Fehlen von CSR-Satzungsklauseln 390 ff
- gemeinnützige Aktivitäten 392 ff
- Gestaltung 400 ff
- Grenzen der Statthaftigkeit 391 ff
- Kundenzufriedenheit 392
- „nachhaltige Unternehmensentwicklung“, Begriff im Aktienrecht 385 ff
- Nachhaltigkeitsfaktoren 382 f
- Pflichtenkreis des Aufsichtsrats 396 ff
- shareholder value-Ansatz 390 f, 403
- Spenden oder sonstige Zuwendungen 391 ff, 396, 408
- stakeholder value-Ansatz 390 f, 403
- unternehmerische Praxis 380 ff
- Verpflichtung aus Unternehmensinteresse 383 f
- Verpflichtung außerhalb des Aktiengesetzes 388 f
- Vorhandensein von CSR-Satzungsklauseln 395 ff
- Vorstandsvergütung, kompetenzrechtliche Grenzen des Aufsichtsrats 397 ff
- Zulässigkeit der Einbeziehung 389 ff

#### **Decentralized Autonomous Organisation (DAO)**

- Blockchain 51 f

#### **Deliktdurchgriffshaftung 485 ff**

- Baustoff-Urteil 486 f

#### **Deliktsstatut**

- Anwendungsbereich 463 ff
- Ausnahmeanknüpfung 455
- Ausweichklausel 455 f

- Berücksichtigung anderer Sicherheits- und Verhaltensregeln 465 ff
- Erfolgsortanknüpfung 454 ff, 512
- haftungsrechtliche Folgen der Menschenrechtsverantwortung 454 ff
- menschenrechtliche Eingriffsnorm, de lege ferenda 470 ff
- ordre public-Verstoß 468 ff
- Rom II-VO 454 ff, 514 ff
- Umweltschäden 459 ff

#### **DE-Mail 23**

#### **De-minimis-Betrag**

- Gemeinwohlbelange und Mittelverwendung 370

#### **Dept-Equity-Swap 74 f, 86**

#### **derivative Haftungsklage der Aktionäre**

- 584 ff
- Abschreckungswirkung 596 f
- Aktien-Vorbesitzererfordernis 629
- Anreizstrukturen 594 ff
- Antrag 589
- ARAG/Garmenbeck-Urteil 588
- Berechtigung eines Beteiligungsquorums 628 f
- Erfolgsprämien-Idee 622 ff
- Erpressungspotential 595 f
- Gegenstand der gerichtlichen Überprüfung 611
- Klagebefugnis 611
- Klagezulassungsverfahren 589, 610 f
- Kontrolldefizite der regulären Corporate Governance 587 f, 597, 630
- Kostenregelung 590 ff, 621 f
- Kostenrisiko 621 f
- Kritik 591 ff
- Principal-Agent-Problem 598
- Problem des Kollektivhandelns 594 f
- Rechtsanwalts-Bereicherungsklage nach amerikanischem Vorbild 625 ff
- Rechtsdurchsetzungsinstrument für große Minderheitsaktionäre 617 ff
- Shareholder Derivative Action, Vergleich 598 ff, 611, 615 ff, 630 f, *s. a.* *dort*
- Sorgfaltspflichtverletzung 612 ff
- Treuepflichtverletzung 612
- Überblick 589 f
- Unredlichkeit 612
- Vergleichsabschluss und -befugnis 616 f
- Voraussetzungen 590
- Vorrang der Gesellschaftsklage 615 ff
- Zerteilung des Verfahrens 610 f

**Deutscher Corporate Governance Codex (DCGK)**

- Einfluss der Stakeholder-Orientierung 724 ff
- Geschäftsleiterpflichten und CSR-Belange 358
- Rechtsverbindlichkeit 317 f

**digitale Rechtssubjekte 938****Digitalisierung**

- Algorithmen, selbst-lernende 19, 23 f, 43
- Big Data 42 f
- Blockchain 44 ff, *s.a. dort*
- Business Registers Interconnection System (BRIS) 21 f
- Cloudcomputing 20
- Cookies 34, 37
- DE-Mail 23
- DSGVO, datenschutzrechtliche Anforderungen 34 ff, *s.a. DSGVO*
- Echtzeitverfügbarkeit 19
- Einfluss auf die Organhaftung 40 ff
- Einsatzmöglichkeiten im Gesellschaftsrecht 19 ff
- ePrivacy-VO 34 ff
- EU-Aktionärsrechterichtlinie 18, 25 ff
- EU-eIDAS-VO 23
- ICLEG 18, 22, 33
- Industrie 4.0 52 ff
- Investor Relation, neue Kommunikationstechnologien 32
- It-Sicherheit 40 ff, *s.a. dort*
- Kapitalmarktrecht 33 f
- Kommunikationserleichterung 19
- Kommunikationsform zwischen den Organen einer AG 31
- lauterkeitsrechtliche Anforderungen 34 f, 38
- Legal Robots 23
- Manipulationsmöglichkeiten 20
- Medienrecht 39 f
- Online Gründungen 21 ff
- Organhaftung 40 ff
- Probleme 20
- Probleme von IT und Internet im Gesellschaftsrecht 19 ff
- Random-Ware 20
- Recht auf Gleichbehandlung 30, 32 f
- Registerpublizität 21 ff
- RL (EU) 2017/1132 21
- RL 2009/101/EG 21
- Smart Contract 47
- Twitter-Kommunikation 39
- Übertragung der Hauptversammlung in Bild und Ton 28
- virtuelle (GmbH-)Gesellschafterversammlung 31

- virtuelle Aufsichtsratsitzung 28 f
- virtuelle Gesellschafterversammlung, übergreifende Probleme 24 f
- virtuelle Hauptversammlung 25 ff
- virtuelle Vorstandssitzung 30
- Vorteile 19
- Webtracking-Tools 34, 37
- Youtube-Kommunikation 39

**doctrine de l'entreprise**

- Jean Paillusseau 1967, juristische Theorie des intérêt social 710 f

**Drittstaaten-Gesellschaften**

- Kohärenz im Internationalen Gesellschaftsrecht 167 ff, *s.a. dort*

**DSGVO**

- Abgrenzung unternehmensbezogene Information/Kommunikation und Werbung 37
- berechtigtes Interesse des Verantwortlichen 36 f
- Blockchain 48 f
- Einwilligung 35 ff
- Rahmenbedingungen für Verwendung und Auswertung von personenbezogenen Daten, Aktionäre 35 ff
- Rechtfertigung der Datenverarbeitung 36
- schutzwürdiges Interesse des Betroffenen 36 f

**Due Diligence 284, 296, 325, 418, 426 ff, 436 f, 479**

- CSR-Berichterstattung, erforderliche Angaben 214 f
- menschenrechtliche Sorgfaltspflicht *s. dort*

**Durchgriffshaftung**

- Konzern 484 f

**Durchgriffsstatut**

- haftungsrechtliche Folgen der Menschenrechtsverantwortung 452 f

**EBA-Leitlinien 92 f, 125****eigene Anteile im Formwechsel 126 ff**

- Erwerb eigener Anteile bei Aktiengesellschaften 127
- Erwerb eigener Anteile bei GmbH 127
- Formwechsel einer GmbH in eine AG 132 f
- Formwechsel einer Personengesellschaft in eine AG 133 f
- Formwechsel in eine AG, Mitteilungspflichten 136 f, 147
- Formwechsel in eine AG, Veräußerungspflichten nach Durchführung 134 f, 147
- Formwechsel in eine AG, Zulässigkeit bei mittelbar gehaltenen eigenen Anteilen 130 ff, 147
- Formwechsel in eine AG, Zulässigkeit bei

- unmittelbar gehaltenen eigenen Anteilen 129 f, 147
- Formwechsel in eine GmbH, Veräußerungspflichten nach Durchführung 139 ff, 148
- Formwechsel in eine GmbH, Zulässigkeit bei unmittelbar und mittelbar gehaltenen eigenen Anteilen 137 f, 148
- Formwechsel in eine Personengesellschaft, Pfandrechte 143 ff, 148
- Formwechsel in eine Personengesellschaft, Zulässigkeit bei mittelbar gehaltenen eigenen Anteilen/Aktien 142 f, 148
- Formwechsel in eine Personengesellschaft, Zulässigkeit bei unmittelbar gehaltenen eigenen Anteilen/Aktien 141 f, 148
- in eine Personengesellschaft, Veräußerungspflichten nach Durchführung 146 f
- mittelbar gehaltene eigener Anteile bei Personengesellschaften 127
- Eigenkapital**
  - Abgrenzung Fremdkapital 735 ff, *s.a. Kapitalabgrenzung*
  - Definition 739
  - Eigenkapitalklassifikation, wirtschaftliche Betrachtungsweise 747 f
  - Finanzierungsfunktion 742 f, 753 ff, 760 ff
  - Finanzinstrument nach IAS 32 753 f
  - formeller Begriff 740
  - funktionale Eigenkapitalabgrenzung 745 ff
  - Funktionen 739 ff
  - Grundkonzeption nach ISA 32 753 ff, 760 ff
  - Haftungsfunktion 744, 747
  - Herrschafts- und Gewinnverteilungsfunktion 742
  - Ingangsetzungs- bzw. Errichtungsfunktionen 741 f
  - Längerfristigkeit der Kapitalüberlassung 743, 746 f
  - materieller Begriff 740 ff, 745
  - ökonomischer Gehalt 739 ff
  - Personengesellschaften, Besonderheiten der (Nach)Haftung 755 ff, 762 ff
  - Unbefristetheit der Kapitalüberlassung 743
  - Verlustausgleichsfunktion 745
- Einblicksgebot**
  - Bilanzrecht, Grenze der Wahlrechtsausübung 658 ff
- Entsprechenserklärung**
  - Abgabe der Wissenserklärung 552, 581 f
  - Absichtserklärung 553 f, 582
  - Befolgung der Absichtserklärung 553 ff, 582
- ePrivacy-VO 34 ff**

**Erbrecht**

- Familienstiftung *s. dort*
- Grenzen der Nachlassbindung 838 f
- Macht der toten Hand 835, 838
- Teilungsrecht 838

**Erbschaftsteuerrecht**

- Familienstiftung 840 ff, *s.a. dort*
- Verschonungsabschlag 841 f

**Erfolgsortanknüpfung 454 ff, 512****ergänzender Geschäftsanteil**

- atypisch stille Beteiligung 873 ff, 898, *s.a. dort*

**ethisches Verhalten**

- Geschäftsleiterpflichten und CSR-Belange 339 ff, 404 f, *s.a. dort*

**EU-Aktionärsrechterichtlinie**

- virtuelle Hauptversammlung 18, 25 ff

**EU-Auslandsgesellschaften**

- Kohärenz im Internationalen Gesellschaftsrecht 166 f

**EU-eIDAS-VO 23****EU-Restrukturierungs-Richtlinie (RLE)**

- Moratorium 65 ff
- persönlicher Anwendungsbereich 59
- Pflichten der Geschäftsleiter 82 ff
- rechtsformübergreifender Ansatz 59 f
- Restrukturierungsfinanzierung 77 ff, *s.a. dort*
- Restrukturierungsplan 68 ff, *s.a. dort*
- Restrukturierungsverfahren 60 ff, *s.a. dort*
- Sanierung 56 ff, *s.a. Sanierung nach geplanter EU-Restrukturierungs-Richtlinie*

**Europäisches Kollisionsrecht**

- kohärente Gestaltung 153 ff, *s.a. Kohärenz im Internationalen Gesellschaftsrecht*

**Familiengesellschaft**

- Assetklassen des Familienvermögens 843
- Begriff 843
- Einfluss natürlicher Personen 843
- Gestaltungsziele, juristische 844 ff
- Kautelen zur Durchsetzung der Gestaltungsziele 845
- Realtypenanalyse 843 f
- Rechtsformwahl 846
- Trägerin eines Familienvermögens 843
- virtuelle 847 ff
- Zweck 843

**Familienstiftung**

- Alternative zur Familiengesellschaft 843 ff, *s.a. Familiengesellschaft*
- Amtsperioden von Vorstandsmitgliedern 860
- Anerkennungsfähigkeit 839
- Ausschaltung privater Risiken 856 f

- autonome Willensbildung durch Stiftungsorgane 848 ff
- Basisorgan 862
- Befugnisse der Stiftungsorgane 850 f
- Befund von Anatol Dutta 839
- Begriff 836
- Destinatäre, gesellschaftsähnliche Stellung 842 f
- Destinatärsversammlung 848 f, 861
- Erbrecht 837 ff
- Erbschafts- und Schenkungsteuerrecht 840 ff, 865 f
- fiktive Satzung 847
- Gemeinnützigkeit 837
- Gestaltungsmöglichkeiten 854 ff
- Grenzen der Nachlassbindung 839
- Königsinstrument der Nachfolgeplanung 835 f
- Lebensfähigkeitsvorbehalts 858
- Leitungsorgan 860
- Macht der toten Hand 835, 838
- Organisationsstrukturen 859
- Rechtsstellung der Destinatäre 851 f, 856
- Satzungsänderungsbefugnisse 862 f
- Simulation einer Familiengesellschaft, Dogmatik des Stiftungsrechts 847 ff, *s.a. Stiftungsrecht*
- Sonderrechte des Stifters 860 f
- Steuerung des Begünstigtenkreises 855
- Surrogat der Familiengesellschaft 847 ff
- Umgehung des Verbots der Selbstzweckstiftung 853 f
- Verbot der Selbstzweckstiftung 852 ff
- Vermögenserhaltung 858 f
- Vermögensverwaltung 858 f
- Verschonungsabschlag für Betriebsvermögen 841 f
- Virtualisierung der Mitglieder 847 ff
- Vorstand, Kuratorium und Beirat als personales Substrat 848, 859
- Widmungserklärung 858

#### **Financial Accounting Standards Board (FASB) 735 ff, *s.a. Kapitalabgrenzung***

#### **Formwechsel**

- einer GmbH in eine AG 132 f
- einer Personengesellschaft in eine AG 133 f
- grenzüberschreitender 903 ff, *s.a. dort*
- Halten eigener Anteile 126 ff, *s.a. eigene Anteile im Formwechsel*
- in eine AG, Mitteilungspflichten 136 f, 147
- in eine AG, Veräußerungspflichten nach Durchführung 134 f, 147

- in eine AG, Zulässigkeit bei mittelbar gehaltenen eigenen Anteilen 130 ff, 147
- in eine AG, Zulässigkeit bei unmittelbar gehaltenen eigenen Anteilen 129 f, 147
- in eine GmbH, Veräußerungspflichten nach Durchführung 139 ff, 148
- in eine GmbH, Zulässigkeit bei unmittelbar und mittelbar gehaltenen eigenen Anteilen 137 f, 148
- in eine Personengesellschaft, Pfandrechte 143 ff, 148
- in eine Personengesellschaft, Veräußerungspflichten nach Durchführung 146 f
- in eine Personengesellschaft, Zulässigkeit bei mittelbar gehaltenen eigenen Anteilen/Aktien 142 f, 148
- in eine Personengesellschaft, Zulässigkeit bei unmittelbar gehaltenen eigenen Anteilen/Aktien 141 f, 148

#### **Forschungsprojekt „financial instruments with characteristics of equity“**

- Kapitalabgrenzung 774 ff

#### **Frankreich**

- Code de Commerce 444 f, 472
- intérêt social *s. dort*

#### **Fremdkapital**

- Abgrenzung Eigenkapital 735 ff, *s.a. Kapitalabgrenzung*

#### **Fruehauf-Fall**

- Berücksichtigung von Nichtaktionärsinteressen 1965 713 f

#### **Gaillard, Emile**

- théorie institutionelle der Aktiengesellschaft von 1932 709 ff

#### **GEDIP-Entwurf**

- Anwendungsbereich, räumlicher 172
- Anwendungsbereich, sachlicher 171 ff
- Ausgleich für Gründungstheorie 178 ff
- Bewertung anhand der Kohärenzherausforderung 181 ff
- CSR-Regelungen 174 f
- Gründungstheorie 175 ff
- ordre public, Eingriffsnorm 179 f
- reduzierte Form als Kompromisslinie bei Kohärenzproblemen 182 f
- Reichweite des Gesellschaftsstatut 176 f
- unternehmerische Mitbestimmung 173 f
- Verkehrsschutzregelung 178 f
- Vorgeschichte 170
- Vorstellung 171
- Wechsel des anwendbaren Rechts 177 f

#### **Gemeinnützigkeitsrecht**

- Wertungsvergleich für Vereinsklassenabgrenzung 10, 638 f

**Gemeinwohlbelange**

- Grenzen der Berücksichtigung 366 ff
- Pflicht und Berechtigung zur Berücksichtigung 341 ff, 375 ff, *s.a. Geschäftsleiterpflichten und CSR-Belange*
- Vergütungsparameter, nichtfinanzielle 379 ff, *s.a. CSR-Vergütungsparameter, nichtfinanzielle*

**Gemeinwohlrecht**

- Einfluss der nationalsozialistischer Ideologie 709, 714
- Gemeinwohlklausel, Aktiengesetz 1937 708 f
- vergleichende Dogmengeschichte Deutschland (Unternehmensinteresse) und Frankreich (*intérêt social*) 705 ff, 731 ff, *s.a. Unternehmensinteresse und intérêt social*

**Geschäftsbetrieb**

- Begriff 5 f
- wirtschaftlicher, Bestimmung vom Handelsrecht her 9, 639
- wirtschaftlicher, gesetzliche Einordnung 10 ff
- Wirtschaftlichkeit 6 ff, 634 ff

**Geschäftsführerhaftung**

- GmbH & Co. KG 796 ff, *s.a. actio pro socio bei GmbH & Co. KG*

**Geschäftsleiterpflichten und CSR-Belange**

- Anerkennung internationaler Standards, mittelbare 356 f
- Anstellungsverträge von Vorständen 374, 378
- Aufsichtsrat, Einfluss- und Kontrollmöglichkeiten 349, 374 f, 377 f
- Berücksichtigung internationaler Standards für legitimes Verhalten 356 f
- Berücksichtigung von Gemeinwohlbelangen, Grenzen 366 ff
- Business Judgment Rule 353 f, 367 f
- Code of Conduct 359
- Compliance-Praxis 358 f
- CSR-Berichterstattungserfordernisse 354 ff
- Deutscher Corporate Governance Kodex (DCGK) 358
- ethisches Verhalten, Freiwilligkeit und Pflicht 339 f, 404 f
- feste Betragsgrenzen zur Verfolgung des Unternehmenszieles 406 f
- Gemeinwohlbelange, Berechtigung zur Berücksichtigung 344 ff
- Gemeinwohlbelange, Pflicht zur Berücksichtigung gegenüber Staat und Allgemeinheit 341 f

- Gemeinwohlbelange, Rechtspflicht zur Berücksichtigung gegenüber Gesellschaft 342 f
- Gemeinwohlbindung, aktienrechtliche 350 ff
- Gesellschaftszweck und Berücksichtigung von Gemeinwohlbelangen 346 ff
- Hauptversammlung, Einfluss- und Kontrollmöglichkeiten 371 ff, 377 f
- Konflikt Anteilseignerinteressen und Gemeinwohlinteressen 344 f
- Mittelverwendung, Zulässigkeitsgrenze für CSR-Belange 366, 368 ff, 377
- Nationaler Aktionsplan (NAP) 357 f
- ökonomische Rechtfertigung gemeinnütziger Maßnahmen 345 ff
- Reputationsmanagement 343 f, 408
- Sozialpflichtigkeit des Eigentums 376
- Überwachung durch Aufsichtsrat 374 ff
- UN-Leitprinzipien für Wirtschaft und Menschenrechte 356 f
- Unternehmensinteresse und Berücksichtigung von Gemeinwohlbelangen 346 ff
- unternehmerische Wertschöpfung, Zulässigkeitsgrenze für CSR-Belange 366 ff, 377
- Vergütungsanreize, nichtfinanzielle 379 ff, *s.a. CSR-Vergütungsparameter, nichtfinanzielle*
- Vorstandskompetenz, Recht zum ethischen Verhalten 364 ff, 377
- Wille der Aktionäre 360 ff
- Zulässigkeit der Berücksichtigung von Gemeinwohlbelangen, gesetzliche 348 ff

**Gesellschaft**

- CSR-Berichtspflichten 232 ff, *s.a. CSR-Berichterstattung*
- CSR-Pflichtenverstoß, Bußgeld 247
- CSR-Pflichtenverstoß, zivilrechtliche Haftung 247 ff

**Gesellschafter**

- atypisch stille *s. atypisch stille Beteiligung*

**Gesellschafterdarlehen**

- Restrukturierungsfinanzierung 77 ff

**Gesellschaftsrecht**

- Blockchain-Technologie 44 ff, *s.a. Blockchain*
- Digitalisierung 17 ff, *s.a. dort*
- Industrie 4.0 52 ff
- Online Gründungen 21 ff

**Gesellschaftsstatut**

- Auseinanderfallen von Satzungs- und Verwaltungssitz 191, 194
- GEDIP-Entwurf zur Reichweite des Gesellschaftsstatut 176 f
- Gourdain/Nadler-Entscheidung 160

- haftungsrechtliche Folgen der Menschenrechtsverantwortung 452 ff
- Internationales Gesellschaftsrecht, Reichweite und Eingriffsnormen 152
- Kohärenz, Abgrenzung zum Insolvenzstatut 152, 159 ff
- Kohärenz, Abgrenzung zum Vertragsstatut bei Behandlung GmbH-Geschäftsführer 163 ff
- Polbud-Urteil *s. dort*
- Statutenwechsel für pseudo-englische Kapitalgesellschaften 902 f

#### **Gesellschaftswohl**

- Handeln von Aufsichtsratsmitgliedern 576 ff, 583

#### **Global Compact der Vereinten Nationen**

- 280 ff, 297, 311, 320 ff
- Legitimation als Rahmenwerk für CSR-Berichterstattung 282
- Leistungsbilanz 281 f
- Leitprinzipien 281
- teilnehmende Unternehmen 281

#### **Global Value Chains Theory (GVC) 413**

#### **GmbH**

- atypisch stille Beteiligung 882 ff, 898, *s.a. dort*
- Aufstellung von Jahres-/Konzernabschlüssen, Wahlrechte und Ermessensspielräume des Geschäftsführers 652
- Business Judgment Rule, Aufstellung von Jahres-/Konzernabschlüssen 654
- Erwerb eigener Anteile 127
- Feststellung/Billigung von Jahres-/Konzernabschlüssen durch Gesellschafterversammlung 653
- Formwechsel in eine AG 132 f
- Formwechsel, Halten eigener Anteile 137 ff, *s.a. eigene Anteile im Formwechsel*
- Formwechsel, Veräußerungspflichten nach Durchführung 139 ff, 148
- Formwechsel, Zulässigkeit bei unmittelbar und mittelbar gehaltenen eigenen Anteilen 137 f, 148
- virtuelle Gesellschafterversammlung 31 f

#### **GmbH & Co. KG**

- Geschäftsführerhaftung 796 ff, *s.a. actio pro socio bei GmbH & Co. KG*

#### **Good Company Ranking 380**

#### **Gourdain/Nadler-Entscheidung 160**

#### **Governance**

- Begriff 413
- Lieferketten 410 ff, *s.a. Lieferketten-Governance*

- private governance 416, 419

- public governance 416

#### **governance gap 414 ff**

#### **Green Washing**

- CSR-Berichterstattung 207, 226, 230

#### **grenzüberschreitende Verschmelzung**

- auf Personenhandelsgesellschaften nach UmwG RefE 908 ff, 917 ff
- begrenzter Bestandsschutz für Umwandlungsvorgänge nach UmwG RefE 911 ff
- Companies (Cross-Border Mergers) Regulations 2007 (CCBMR 2007) 906
- Herausverschmelzung 904
- Hineinverschmelzung 904, 908 ff
- pseudo-englische Kapitalgesellschaften 906 ff
- Referentenentwurf eines Vierten Gesetzes zur Änderung des Umwandlungsgesetzes *s. dort*
- SEVIC-Entscheidung 907
- Übergangsregelung nach UmwG RefE 911 ff
- Verschmelzungsbescheinigung 913 ff, 920 f
- Verschmelzungsplan 909 f
- Verschmelzungsprüfung 910
- Verschmelzungsrichtlinie 906

#### **grenzüberschreitender Formwechsel**

- begrenzter Bestandsschutz für Umwandlungsvorgänge nach UmwG RefE 911 ff
- beschränkte Handlungsmöglichkeiten für pseudo-englische Gesellschaften 902 ff
- grenzüberschreitende Verschmelzung auf Personenhandelsgesellschaften nach UmwG RefE 908 ff, 917 ff
- Kombinationslehre 904, 923 ff
- Polbud-Entscheidung 905
- Übergangsregelung nach UmwG RefE 911 ff
- UmwG RefE, minimalinvasive Maximallösung für pseudo-englische Kapitalgesellschaften 900 ff, 913 ff, 921 ff, 925 ff
- VALE-Entscheidung 904 f

#### **GRI Standards 213, 275 f**

#### **Gründungstheorie**

- GEDIP-Entwurf 175 ff

#### **Haftungsklage**

- Aktionäre *s. derivative Haftungsklage der Aktionäre*

#### **haftungsrechtliche Folgen der Menschenrechtsverantwortung, Lösungsansätze im deutschen IPR**

- anwendbares Recht 452 ff
- Ausnahme von der Erfolgsortanknüpfung 455



- Ausweichklausel 455 ff
- Berücksichtigung anderer Sicherheits- und Verhaltensregeln 465 ff
- Deliktsdurchgriffshaftung 453
- Deliktsstatut 454 ff, 463 ff, *s.a. dort*
- Deutschland, Nationaler Aktionsplan 447 f
- Durchgriffsstatut 452 f
- Erfolgsortanknüpfung 454 ff, 512
- Frankreich, Konzernhaftung nach dem Code de Commerce 444 f, 472
- Gesellschaftsstatut 452 ff
- globale Arbeitsteilung 440 ff
- kollisionsrechtliche Fragestellungen 448 f
- Konkretisierung der Sorgfaltspflicht 450 ff
- Konzernobergesellschaft, deutsche 452 ff
- menschenrechtliche Eingriffsnorm, de lege ferenda 470 ff
- Menschenrechtsverletzungen 450
- ordre public-Verstoß 468 ff
- Rechtswahl, nachträgliche 463
- Rom II-VO, anwendbares Recht 454 ff, 514 ff
- Schweiz, Konzernverantwortungsrichtlinie 445 ff, 473
- übernationaler Sorgfaltsstandard 450 f
- Umweltschäden 459 ff
- UN-Leitprinzipien für Wirtschaft und Menschenrechte 443 ff, *s.a. dort*
- Unternehmensverantwortung 440 ff
- Zumutbarkeitsgrenzen 451
- Hash-Abbildungen 45**
- Hauptversammlung**
  - Gemeinwohlbelange, Einfluss- und Kontrollmöglichkeiten 371 ff, 377 f
  - Übertragung in Bild und Ton 28
  - virtuelle 25 ff
- Hauptversammlungsbeschluss**
  - Anfechtbarkeit bei fehlerhaftem CSR-Bericht 251 ff
  - Entlastungsbeschlüsse, fehlerhafte Entsprechenserklärung 251 ff
- Hauptversammlungs Niederschrift, notarielle**
  - Angabe des zahlenmäßigen Abstimmungsergebnisses 693, 701
  - Art der Abstimmung 691, 701
  - Berichtigung nach Entäußerung 697, 701
  - Berichtigung nach getätigten Dispositionen im Vertrauen auf Richtigkeit 701
  - Berichtigung ohne Mitwirkung der Beteiligten 701
  - Berichtigung, Anwendung BGH-Leitlinien auf privatschriftliche Protokolle 701
  - Berichtigung, offensichtliche Unrichtigkeit 696 f
  - Beschreibung des Vorgangs der Abstimmung 691
  - Pflichtangaben, Leitlinien des BGH 690 ff
  - Prozentangaben, keine Nichtigkeitsfolge bei eindeutigem Ergebnis 694 f
  - Rechtsgrund der Abstimmungsart 692
  - Relevanz eines Bekanntmachungsmangels 700
  - Verbrauch gerichtlicher Ermächtigung zur Einberufung der Hauptversammlung 699 f
- ICLEG 18, 22, 33**
- Idealverein 8 ff, 633 ff, *s.a. Vereinsklassenabgrenzung***
  - Rechtsformkontrolle 639 ff
- ILO-Grundsatzerklärung zu multinationalen Unternehmen und zur Sozialpolitik 288 ff, 297, 311**
  - Legitimation als Rahmenwerk für CSR-Berichterstattung 289 f
  - Leitprinzipien 289
- Industrie 4.0**
  - Auswirkungen der Digitalisierung 52 ff
  - Datenschutz 54
- Input-Legitimation 280**
- Insolvenz**
  - drohende 61
  - Sanierung nach geplanter EU-Restrukturierungs-Richtlinie 56 ff, *s.a. dort*
  - vorinstanzliches Sanierungsverfahren *s. Restrukturierungsverfahren*
- Insolvenzstatut**
  - Abgrenzung Gesellschafts- und Insolvenzstatut 152, 159 ff
  - Gourdain/Nadler-Entscheidung 160
- intérêt social**
  - aktionärsorientierte Interpretation von Dominique Schmidt 723
  - arrêt Carignon 1997, strafrechtlicher Schutz von Gesellschaftsvermögen und Drittinteresse 718
  - arrêt Fruehauf 1965, Berücksichtigung von Nichtaktionärsinteressen 713 f
  - arrêt Motte 1946, hierarchische Organisation und Gewaltenteilung 710
  - arrêt Piquard 1961, Missbrauch der Mehrheitsmacht 717
  - Beginn der Entwicklung 709 ff
  - Code AFEP-MEDEF 726
  - Einfluss der Finanzkrise 2007/2008 725 f
  - Emile Gaillard, théorie institutionelle der Aktiengesellschaft von 1932 709 ff

- Jean Paillusseau, doctrine de l'entreprise 1967 710 f
- Loi PACTE-Entwurf 2018, Reformulierung der Art. 1833 und 1835 Code civil 728 ff
- Reform des französischen Aktienrechts 1966 715 f
- Responsabilité Sociale des Entreprises (RSE) 726 f
- Schule von Renne 710
- Stakeholder-Orientierung 725 f
- théorie contractuelle 710, 720 ff, 725
- Unternehmensinteresse, vergleichende Dogmengeschichte Deutschland und Frankreich 705 ff, 731 ff, *s.a. Unternehmensinteresse*

#### **International Accounting Standards Board (IASB) 735 ff, *s.a. Kapitalabgrenzung***

- Forschungsprojekt „financial instruments with characteristics of equity“ 774 ff

#### **International Financial Reporting Standards (IFRS)**

- Informationsvermittlung des IFRS-Abschlusses 747 ff
- Kapitalabgrenzung 735 ff, *s.a. dort*

#### **Internationale Rahmenwerke für CSR-Berichterstattung**

- Berechtigungsgrundlage für Berücksichtigung von Gemeinwohlbelangen 355 f
- Einbeziehung, Ausblick 293 f
- Global Compact der Vereinten Nationen 275, 280 ff, 311, 320, *s.a. dort*
- GRI Standards 275 f
- ILO-Grundsatzerklärung zu multinationalen Unternehmen und zur Sozialpolitik 275, 288 ff, 311
- Input-Legitimation 280
- ISO 26000-Standard „Leitfaden zur gesellschaftlichen Verantwortlichkeit“ 275 f, 290 ff, 311
- Legitimation, Haftungsmaßstab 325 f
- Legitimationsanforderungen 278
- Legitimationsbedürfnis 277
- Legitimationsmaßstäbe 279 f
- OECD-Leitsätze für multinationale Unternehmen 275, 286 ff, 311
- Output-Legitimation 280
- Steuerungswirkung, tatsächliche 279
- UN-Leitprinzipien für Wirtschaft und Menschenrechte 275 f, 282 ff, 311, 325, 356 f *s.a. dort*
- Unterschiede, vergleichende Bewertung 292 ff
- „weiches“ und „hartes“ Recht 275

#### **Internationales Gesellschaftsrecht**

- Abgrenzung Arbeitsvertragsstatut und Gesellschaftsstatut, GmbH-Geschäftsführer 163 ff
- analytische Methode des IPR zur Kohärenzherausforderung 156 ff
- „deutsche“ LLP, Kohärenzhindernis 156 ff
- doppelte Spaltung des Gesellschaftskollisionsrechts als Kohärenzhindernis 165 ff
- Drittstaaten-Gesellschaften 167 ff
- EU-Auslandsgesellschaften 166 f
- europäisches 150, 169
- GEDIP-Entwurf 150, 170 ff, *s.a. dort*
- Gesellschafts- und Insolvenzstatut, Abgrenzung 152, 159 ff
- Gesellschaftsstatut, Reichweite 152
- kohärente Gestaltung des Europäischen Kollisionsrecht 153 ff
- Kohärenz, Begriff 153
- Kohärenzebenen 154
- loi uniforme 151
- LSE-Studie 151
- Polbud-Rechtssache 150 f
- policy option der EU-Kommission, Gesamtkodifikation des Europäischen Kollisionsrechts 183 f
- policy option der EU-Kommission, reduzierte Form des GEDIP-Entwurfs 182 f
- Sitztheorie 167 ff
- Sitzverlegung 152 f
- Studie zum Internationalen Gesellschaftsrecht der EU-Kommission 151 ff
- teleologische Auslegung als Kohärenzherausforderung 162 ff
- unionaler Arbeitnehmerbegriff 163 ff

#### **Investoren**

- Investor Relation, neue Kommunikationstechnologien 32, 36
- Kommunikation, Anforderungen nach DSGVO 34 ff

#### **ISA 32**

- Finanzinstrument, Definition 753
- Kapitalabgrenzung 735 ff, 753 ff, 760 ff *s.a. dort*
- novellierte Kapitalabgrenzung, ISA 32 (rev. 2008) 764 ff

#### **ISO 26000-Standard 290 ff, 311**

- Legitimation als Rahmenwerk für CSR-Berichterstattung 291 f
- Mitglieder 290
- sieben Grundsätze gesellschaftlicher Verantwortung 290

#### **It-Sicherheit**

- Anbindung an Geschäftsführung 41

- Bedeutung für Geschäftsprozesse 40 f
- MaRisk 41
- Zertifizierungen 41 f

### **Jahresabschluss**

- Aufstellung, Zuständigkeit 652
- Feststellung, Zuständigkeit 653
- Fremd- und Eigenkapital, Abgrenzung s. *Kapitalabgrenzung*
- International Financial Reporting Standards (IFRS) 735 ff

### **juristische Person**

- organschaftliches Handeln 935 ff

### **Kapitalabgrenzung**

- „alpha“-Ansatz des IASB 774 f
- „amount“-Kriterium 776 ff, 789 f
- Änderungsvorschläge der Standardsetzer 769 ff
- Anforderungen der Investoren an das im IFRS-Abschluss ausgewiesenen Eigenkapitals 749 ff
- ausländische Jurisdiktionen, Fremdkapitalausweis 759
- „basic-ownership“-Ansatz (BOA) des FASB 769 f, 773
- „beta“-Ansatz des IASB 774 f
- claim approach 751 f
- dichotome Gliederung der Passivseite 751 f
- Diskussionspapier „financial instruments with characteristics of equity“ 2018 737, 775
- Eigenkapital, Definition und Funktionen 739 ff, s.a. *Eigenkapital*
- Eigenkapitalklassifikation, wirtschaftliche Betrachtungsweise 747 f
- Finanzierungsfunktion, eindimensionales Abgrenzungskriterium 753 ff, 760 ff
- Finanzinstrument nach ISA 32 753 f
- Finanzinstrumente, kündbare 754, 764 f
- Forschungsprojekt „financial instruments with characteristics of equity“ des IASB 774 ff
- Fortentwicklungsperspektiven de lege ferenda 766 ff
- funktionale Eigenkapitalabgrenzung 745 ff
- „gamma“-Ansatz des IASB 775 f
- Gesellschaftereinlagen, Eigenkapitalausweis und Haftungsfunktion 760 ff
- Grundkonzeption nach ISA 32 753 ff, 760 ff
- Haftkapital 755
- Haftungsfunktion des Eigenkapitals 744, 747
- Informationsbedürfnisse der Bilanzadressaten 748 ff
- Informationsvermittlung des IFRS-Konzernabschlusses 747 ff

- International Financial Reporting Standards (IFRS) 736
- kasuistische Lösung 784 ff
- Längerfristigkeit der Kapitalüberlassung 743, 746 f
- „loss-absorption“-Ansatz (LAA) der EFRAG 766 ff
- Nachhaltigkeit der Kapitalüberlassung 747, 762, 767
- novellierte Kapitalabgrenzung des IASB, ISA 32 (rev. 2008)
- „ownership-settlement“-Ansatz (OSA) des FASB 770 f, 773
- Personengesellschaften, gesellschaftsrechtliche Besonderheiten der (Nach)Haftung 754 ff, 762 ff
- „reassessed-expected-outcomes“-Ansatz (REOA) des FASB 771 f
- Relevanz 739 ff
- „timing“-Kriterium 776 ff, 787 f
- Unbefristetheit der Kapitalüberlassung 743

### **Kapitalgesellschaft**

- pseudo-englische 900 ff, s.a. *dort*

### **Kapitalmarktrecht**

- Anforderungen nach DSGVO 34 ff, s.a. *DSGVO*
- Digitalisierung, neue Kommunikationstechnologien 33 ff

### **Kinderarbeit** 289, 296, 427, 481 f

### **Kita-Rechtsprechung** 3, 8, 16, 633 ff, s.a.

#### *Vereinsklassenabgrenzung*

### **Kohärenz im Internationalen Gesellschaftsrecht** 153 ff

- Abgrenzung Arbeitsvertragsstatut und Gesellschaftsstatut, GmbH-Geschäftsführer 163 ff
- Abgrenzung Gesellschafts- und Insolvenzstatut 152, 159 ff
- analytische Methode des IPR zur Kohärenzherausforderung 156 ff
- Begriff 153 f
- „deutsche“ LLP, Kohärenzhindernis 156 ff
- doppelte Spaltung des Gesellschaftskollisionsrechts als Kohärenzhindernis 165 ff
- Drittstaaten-Gesellschaften 167 ff
- Ebenen 154
- EU-Auslandsgesellschaften 166 f
- GEDIP-Entwurf 150, 170 ff, s.a. *dort*
- kohärente Gestaltung des Europäischen Kollisionsrecht 153 ff
- LSE study group 151
- policy option der EU-Kommission, Gesamtkodifikation des Europäischen Kollisionsrechts 183 f

- policy option der EU-Kommission, reduzierte Form des GEDIP-Entwurfs 182 ff
- Sitztheorie 167 ff
- Studie zum Internationalen Gesellschaftsrecht der EU-Kommission 151 ff
- teleologische Auslegung als Kohärenzherausforderung 162 ff
- unionaler Arbeitnehmerbegriff als Anwendungsbeispiel 163 ff
- Unionsrecht 153 f

#### **Kommanditisten**

- Klage gegen Geschäftsführer der Komplementär-GmbH *s. actio pro socio bei GmbH & Co. KG*

#### **Komplementär-GmbH**

- Geschäftsführerhaftung *s. actio pro socio bei GmbH & Co. KG*

#### **Konzernabschluss**

- Aufstellung, Zuständigkeit 652
- Billigung, Zuständigkeit 653
- Informationsvermittlung des IFRS-Konzernabschlusses 747 ff
- International Financial Reporting Standards (IFRS) 735 ff

#### **Konzernhaftung**

- Deklarationshaftung 508
- Delegationsgrundsätze 502 ff
- Deliktdurchgriffshaftung 485 ff
- Deliktshaftung 488 ff
- Durchgriffshaftung 484 f
- haftungsrechtliche Folgen der Menschenrechtsverantwortung, Lösungsansätze im deutschen IPR *s. dort*
- Mutter-Verantwortlichkeit für Menschenrechtsverletzungen 479 ff, 513 f *s.a. dort*
- Organhaftung 506 ff
- Residualpflicht 504 ff
- Unternehmensorganisationspflicht, konzernweite 500 ff
- Verkehrssicherungspflicht 500 ff
- Verrichtungsgehilfe, Mutter und -Tochterverhältnis 489 ff
- Weisungsgebundenheit 490, 516 ff

#### **Konzernrecht**

- *actio pro socio*, Durchbrechung der Beschränkung auf Sozialansprüche 804

#### **Korruption** 425

#### **Kreditinstitut**

- Aufsichtsrat *s. Aufsichtsrat von Kreditinstituten*

#### **Kreditwesengesetz**

- Aufsichtsrat von Kreditinstituten, Regelungen zur Zusammensetzung, Organisation

und Aufgaben *s. Aufsichtsrat von Kreditinstituten*

#### **Lagebericht über nichtfinanzielle Leistungsindikatoren**

- Prüfung und Sanktionen 314
- Überschneidung zur CSR-Berichterstattungspflicht 216 ff

#### **Legal Judgment Rule**

- Bilanzierungsentscheidungen, rechtswidrige 675 ff

#### **Legal Robots** 23

#### **Lieferketten-Governance**

- assoziierte Person 424 f
- Auswirkungen internationaler Rechtsrahmen 426 ff
- chain law 416
- CSR-Berichterstattung 419 ff
- CSR-Richtlinie (2014/95/EU) 419 ff
- CSR-RiLi-UG 419
- Devoir de vigilance Gesetz 422 ff
- Global Value Chains Theory (GVC) 413
- governance gap 414 ff
- Governance, Begriff 413
- hybrides Regelungswerk 410 f, 429 ff
- Korruption 425
- menschenrechtliche Sorgfaltspflichten 422 ff
- private governance 416, 419
- public governance 416
- Stellung von CSR 411 ff
- UK Bribery Act 424 ff
- UK Modern Slavery Act 2015 417 ff
- Unternehmensstrafbarkeit 424 ff
- zukünftige Entwicklung 432

#### **Limited Liability Partnership (LLP)**

- Kohärenzhindernis, Internationales Gesellschaftsrecht 156 ff

#### **loi de vigilance** 308

- Lieferketten 422 ff

#### **loi uniforme** 151, 172

#### **LSE-Studie** 151 ff, *s.a. Kohärenz im Internationalen Gesellschaftsrecht*

#### **MaRisk** 41

#### **McKesson/Celesio-Entscheidung**

- Angemessenheit der Gegenleistung im Übernahmerecht 811 ff, *s.a. dort*
- Auswirkungen auf die Praxis 826 ff
- Berechnung der Gegenleistung bei Wandelanleihen im Übernahmerecht 829 f
- Entscheidung 813, 821 ff, 826 ff
- Sachverhalt 812
- Vereinbarung zum derivativen Erwerb von Wandelanleihen im Übernahmerecht 823, 832

**Menschenrechte**

- aiding and abetting-Fälle 483
- Bindungswirkung 481 f
- Eingriffe durch Unternehmen 483
- mittelbarer Eingriff 482 f
- Schutzbereich 482
- UN-Flüchtlingskonvention 482
- UN-Kinderrechtskonvention 482
- unmittelbarer Eingriff 482 f
- Verletzung, vorsätzliches und fahrlässiges 483

**menschenrechtliche Sorgfaltpflicht**

- deutsche Konzernobergesellschaft, Qualifikation der Sorgfaltpflichten 453 f
- Gesetzesvorschlag zur Verankerung im deutschen Recht 308 f
- Konkretisierung der Maßstäbe 450 f
- Lieferketten 422 ff
- Loi de vigilance 422 ff
- Menschenrechte 480 ff, *s.a. dort*
- Mutter-Verantwortlichkeit für Menschenrechtsverletzungen 479 ff, 513 f *s.a. dort*
- übernationaler Sorgfaltsstandard 450 f
- UN-Leitprinzipien für Wirtschaft und Menschenrechte 304 f, *s.a. dort*

**Menschenrechtsverantwortung**

- haftungsrechtliche Folgen *s. haftungsrechtliche Folgen der Menschenrechtsverantwortung, Lösungsansätze im deutschen IPR*
- Menschenrechte 480 ff, *s.a. dort*
- Menschenrechtsverletzung 480 ff, 513 f
- UN-Leitprinzipien für Wirtschaft und Menschenrechte *s. dort*

**Modern Slavery Act s. UK Modern Slavery Act 2015****Mutter-Verantwortlichkeit für Menschenrechtsverletzungen**

- action en complément du passif 509
- aiding and abetting-Fälle 483
- Ausnahmen von der Deliktsanknüpfung 508 ff
- Ausnahmeregel des Art. 1 Abs. 2 lit. d Rom II-VO 508 f
- Baustoff-Urteil 486 f, 507 f
- Deklarationshaftung 508
- Delegationsgrundsätze 502 ff
- Deliktsdurchgriffshaftung 485 ff
- Deliktshaftung 489 ff
- Durchgriffshaftung im Konzern 484 f
- Einflussmöglichkeit auf Tochterunternehmen 488
- Einstandspflicht nach § 31 BGB 506 ff
- Haftung aus § 823 Abs. 1 BGB 500 ff
- Haftung aus § 831 BGB 489 ff, 516 ff

- haftungsrechtliche Folgen der Menschenrechtsverantwortung, Lösungsansätze im deutschen IPR *s. dort*
- Menschenrechte 480 ff, *s.a. dort*
- Menschenrechtsverletzung 480 ff, 513 f
- Organhaftung 506 ff
- Residualpflicht 504 ff
- Trennungsprinzip 488 f, 500 ff
- Unternehmensorganisationspflicht, konzernweite 500 ff
- Verkehrssicherungspflicht 500 ff
- Verrichtungsgehilfe 489 ff
- Weisungsgebundenheit 490, 516 ff
- wrongful trading 509
- zivilrechtliche Haftung de lege lata 484 ff

**nachhaltige Unternehmensentwicklung**

- Ausrichtung der Vergütungsstruktur 385 ff

**Nachhaltigkeit**

- nichtfinanzielle Vergütungsparameter 382 f, 385 ff

**Nationaler Aktionsplan (NAP) 357 f**

- haftungsrechtliche Folgen der Menschenrechtsverantwortung 447 f
- kritische Bewertung 304
- menschenrechtliche Sorgfaltpflicht 306 f
- Monitoringverfahren 307

**Neugründung**

- Niederlassungsfreiheit, Polbud-Urteil 194 f, *s.a. Polbud-Urteil*

**nichtfinanzielle Leistungsindikatoren 216 ff, 229, 311 f, 314****Niederlassungsfreiheit**

- Auseinanderfallen von Satzungs- und Verwaltungssitz 191, 194
- Beschränkungen 191 f, 195 f
- Centros-Entscheidung 191, 194
- Liquidationserfordernis 191, 201
- Neugründung einer Gesellschaft 194 f
- Schutzbereich, fehlende Mobilitätskomponente nach Polbud-Urteil 192 ff, *s.a. Polbud-Urteil*
- Sitzungsverlegungsrichtlinie 196 ff, *s.a. dort*
- Wechsel bei laufenden Geschäften 194 f
- Wegzugserfordernisse 191, 201

**OECD-Leitsätze für multinationale Unternehmen 286 ff, 296**

- Anwendungsbereich 286
- Durchsetzungsmechanismus 287
- Legitimation als Rahmenwerk für CSR-Berichterstattung 287 f
- neun Bereiche für Verhaltensmaßstäbe 286 f

**Offene Handelsgesellschaft**

- atypische stille Beteiligung, Haftungsfragen 893

**Offenkundigkeitsprinzip**

- organschaftliches Handeln 932, 937

**Online Gründungen** 21 ff**Ordre public**

- GEDIP-Entwurf, Eingriffsnorm 175 ff

**Organhaftung**

- Big Data 42 f

- Digitalisierung und It-Sicherheit 40 ff

**organschaftliche Vertretungsmacht** 930 ff

- Aktiv- und Passivvertretung 941
- auftragsrechtlichen Entschädigungspflicht 932
- Bedeutung 934 f
- digitale Rechtssubjekte 938
- Friedrich Carl von Savigny 938
- Gesamtvertretung 941 ff
- historisch-aktienrechtliche Entwicklung 932 ff
- Offenkundigkeitsprinzip 932, 937
- Organrechtsfähigkeit 931
- Organtheorie 936 ff
- Otto von Gierke 936
- rechtsgeschäftlicher Erklärungsvertreter 942 f
- rechtsgeschäftliches Organhandeln 935 ff
- Umfang 943
- Vertretertheorie 935 ff
- Volker Beuthien 936 f
- Zurechnungsmodelle 935 ff

**Österreich**

- Vereinsrecht, Rechtslage 14

**Output-Legitimation** 280**Paillusseau, Jean**

- doctrine de l'entreprise, juristische Theorie des intérêt social von 1967 710 f

**Personengesellschaft**

- atypische stille Beteiligung 890 ff, 899, *s.a. dort*
- Formwechsel einer Personengesellschaft in eine AG 133 f
- Formwechsel, mit Pfandrecht belastete Anteile 143 ff, 148
- Formwechsel, Veräußerungspflichten nach Durchführung 146 f
- Formwechsel, Zulässigkeit bei mittelbar gehaltenen eigenen Anteilen/Aktien 142 f, 148
- Formwechsel, Zulässigkeit bei unmittelbar gehaltenen eigenen Anteilen/Aktien 141 f, 148
- Gesellschaftereinlagen und Eigenkapitalausweis nach ISA 32 760 ff
- GmbH & Co. KG, Geltendmachung der

Geschäftsführerhaftung durch Kommanditisten *s. actio pro socio bei GmbH & Co. KG*

- Kapitalabgrenzung, Besonderheiten der (Nach)Haftung 755 ff, 762 ff
- mittelbar gehaltene eigene Anteile 127

**Personenhandelsgesellschaften**

- englische, grenzüberschreitenden Anweisung 907
- grenzüberschreitende Verschmelzung nach UmwG RefE 908 ff, 917 ff

**Pfandrecht**

- Formwechsel in eine Personengesellschaft, belastete eigene Anteile 143 ff, 148
- Formwechsel in eine Personengesellschaft, Rechte des Pfandrechtsgläubiger 145 f

**Polbud-Urteil** 150 f, 905

- Kritik 192 ff
- Liquidationserfordernis 191, 201
- Missbrauchsbegriff, unkonturierter 195 f
- Neugründung einer Gesellschaft 194 f
- Sachverhalt 187
- Schlussanträge 189 f
- Schutzbereich der Niederlassungsfreiheit 192 ff
- Sitzungsverlegungsrichtlinie 196 ff, *s.a. dort*
- Urteilsausführungen 190 ff
- Vorlagefrage 188 f
- Wechsel bei laufenden Geschäften 194 f
- Wegzugserfordernis 191, 201

**private governance** 416, 419**Prozessführungsbefugnis bei der actio pro socio**

- Ableitung aus Mitgliedschaftsverhältnis 799
- Aktienrecht, Durchbrechung der Beschränkung auf Sozialansprüche 804
- Beschränkung auf Sozialansprüche, Ausnahmen 802
- Beschränkung auf Sozialansprüche, Rechtfertigung und Ursprung 798 ff
- Freistellung des geschäftsführenden Gesellschafters von gesellschaftsinternen Streitigkeiten 801 f
- Konzernrecht, Durchbrechung der Beschränkung auf Sozialansprüche 805
- Rechtsunsicherheit hinsichtlich des tatsächlichen Bestehens der Prozessführungsbefugnis 800 ff
- Übertragbarkeit auf kapitalistische Personengesellschaften *s. actio pro socio bei GmbH & Co. KG*
- Wahrung der gesellschaftsinternen Zuständigkeitsregeln 800 f

**pseudo-englische Kapitalgesellschaft**

- Asset Deal 903

- begrenzter Bestandsschutz für Umwandlungsvorgänge 911 ff
- Brexit 901 ff
- erweiterte Verschmelzungsmöglichkeiten nach UmwG RefE 908 ff
- Gesamtrechtsnachfolge 903
- Gesellschaftsstatut 902
- grenzüberschreitende Verschmelzung 906 ff, *s.a. dort*
- grenzüberschreitender Formwechsel 903 ff, *s.a. dort*
- Hineinformwechsel nach Deutschland, unmöglicher 904 f
- Kombinationslehre 904, 923 ff
- Polbud-Entscheidung 905
- Referentenentwurf eines Vierten Gesetzes zur Änderung des Umwandlungsgesetzes *s. dort*
- Sitztheorie 902, 921 ff
- Statutenwechsel 902 f
- Übergangsregelung nach UmwG RefE 911 ff
- UmwG RefE, minimalinvasive Maximallösung 900 ff, 913 ff, 921 ff, 925 ff
- VALE-Entscheidung 904 f
- Verschmelzung auf Personenhandelsgesellschaften 908 ff, 917 ff
- Verschmelzungsbescheinigung 913 ff, 920 f
- public governance** 416
- Rainforest Alliance** 299 f
- Random-Ware** 20
- Rathenau, Walther**
  - Unternehmensinteresse, Entwicklung 706 f
- Referentenentwurf eines Vierten Gesetzes zur Änderung des Umwandlungsgesetzes (UmwG RefE)**
  - begrenzter Bestandsschutz für Umwandlungsvorgänge 911 ff
  - grenzüberschreitende Verschmelzung auf Personenhandelsgesellschaften 908 ff, 917 ff
  - minimalinvasive Maximallösung für pseudo-englische Kapitalgesellschaften 900 ff, 913 ff, 921 ff, 925 ff
  - Sitztheorie 921 ff
  - Übergangsregelung 911 ff
  - Verschmelzungsbescheinigung 913 ff, 920 f
  - Verschmelzungsplan, Mindestinhalt 909 f
  - Verschmelzungsprüfung 910
- Registerpublizität** 21 ff
- Reputation** 343 f, 408
- Residualpflicht** 504 ff
- Responsabilité Sociale des Entreprises (RSE)** 726 f
- Restrukturierungsfinanzierung**

- Ausschüttungsverbote 81, 85
- Differenzhaftung des Inferenten 81
- Gesellschafterdarlehen, Spannungsverhältnis zu insolvenzrechtlichen Sonderregeln 77 ff
- Gläubigerschutzregeln, gesellschaftsrechtliche 80 ff
- Grenzen 80 ff
- Haftung wegen Masseschmälerung 81
- Schutz 77 ff
- Transaktionen, anfechtungsfeste und privilegierte 80
- Restrukturierungsplan**
  - Dept-Equity-Swap 74 f, 86
  - Diskriminierungsschutz, fehlender gruppenübergreifender 71 f
  - Einbeziehung der Anteilsinhaber 70 f
  - Eingriff in Rechtsstellung der Gesellschafter und Struktur der Schuldnergesellschaft 70 f
  - Einteilung in Gläubigerinteressengruppen 69
  - Ersetzungsbefugnis, gruppenübergreifende 71
  - Gesellschaftsanteile, Verzicht auf zwangsweise Umgestaltung 73
  - Inhalt 68 ff
  - Obstruktionsverbot, gesellschaftsrechtliches 76 f
  - Regelungen zur Einbindung der Anteilsinhaber 73 f
  - Verbindung von Rekonstruierungsplan mit Gesellschafterbeschlüssen 74 f
  - Verfahren 69
  - Ziel 68
- Restrukturierungs-Richtlinie (RLE) s. EU-Restrukturierungs-Richtlinie (RLE)**
- Restrukturierungsverfahren**
  - Antragspflicht, fehlende 64
  - drohende Insolvenz 61
  - Durchsetzungssperre 65
  - Einleitung des Verfahrens 60 ff
  - Einstiegsvoraussetzungen 61
  - Eintritt drohender Zahlungsunfähigkeit 62
  - Entscheidungsbefugnis 60
  - Finanzierung, Schutz und Grenzen *s. Restrukturierungsfinanzierung*
  - Geschäftsführung im Verfahren 64 f
  - Moratorium 65 ff
  - Pflichten der Geschäftsleiter 82 ff
  - Reorganisationsbedarf 61
  - Ruhen der Insolvenzantragspflicht während des Moratoriums 66 f
  - scheme of arrangement 63, 73, 85

- Sorgfaltspflichten, Spannungsverhältnis zu deutschem Recht 83
- Strategiekrise 61
- Überleitung in das Insolvenzverfahren 68
- überschuldungsnahe Lage 62
- Verhältnis des Moratoriums zu insolvenzrechtlichen Zahlungsverboten 67 f
- Verwaltungs- und Verfügungsbefugnis der Schuldnergesellschaft 64
- Zeitpunkt der Verfahrenseinleitung 61
- Rom II-VO**
  - Ausnahmeregel zur Deliktsanknüpfung 508 f
  - Deliktsstatut, haftungsrechtliche Folgen der Menschenrechtsverantwortung 454 ff, 514 ff
- „Rom-VO“ für das Internationales Gesellschaftsrecht** 149 ff, *s.a. Kohärenz im Internationalen Gesellschaftsrecht*
- GEDIP-Entwurf 170 ff, *s.a. dort*
- Ruggie-Principles s. UN-Leitprinzipien für Wirtschaft und Menschenrechte**
- Sanierung nach geplanter EU-Restrukturierungs-Richtlinie** 56 ff
  - Einführungsbestrebungen eines vorinsolvenzlichen Sanierungsverfahrens 57 f
  - Moratorium 65 ff
  - persönlicher Anwendungsbereich 59
  - Pflichten der Geschäftsleiter 82 ff
  - rechtsformübergreifender Ansatz 59 f
  - Restrukturierungsfinanzierung, Schutz und Grenzen 77 ff, 80 ff, *s.a. Restrukturierungsfinanzierung*
  - Restrukturierungsplan 68 ff, *s.a. dort*
  - Restrukturierungsverfahren 60 ff, *s.a. dort*
  - Ruhen der Insolvenzantragspflicht während des Moratoriums 66 f
  - Sorgfaltspflichten nach deutschem Recht 83 f
- Savigny, Friedrich Carl von** 938
- scheme of arrangement** 63, 73, 85
- Schenkungssteuerrecht**
  - Familienstiftung 840 ff, *s.a. dort*
- Schweiz**
  - Konzernverantwortungsrichtlinie 445 ff, 473
  - Vereinsrecht, Rechtslage 14
- SEVIC-Entscheidung** 907
- Shareholder Derivative Action**
  - Anwaltsklage 599, 625 f
  - Board of Directors, Klagebefugnis 600
  - Business Judgment Rule 600 ff
  - Demand-Erfordernis 601 f
  - derivative Aktionärs-Haftungsklage, Vergleich 598 ff, 611, 615 ff, 630 f
  - Folgen für die Gesellschaften 604 ff
  - Gegenstand der gerichtlichen Überprüfung 611
  - Gesellschaft als Mitbeklagte 615
  - Gewinn und Kosten, Gegenüberstellung 608 f
  - Honorarregelungen 599
  - Verfahrensbeendigungen, empirische Untersuchungen 605 ff
  - Vergleichsabschlussbefugnis 616
  - Zulassungshürden 600 ff
- shareholder value-Ansatz** 330, 360, 390 f, 403
  - Einfluss auf Unternehmensinteresse 720
- Single Supervisory Mechanism (SSM)** 93
- Sitztheorie**
  - Drittstaaten-Gesellschaften 167 ff
  - Statutenwechsel für pseudo-englische Kapitalgesellschaften 902 f, 921 ff
- Sitzungsverlegungsrichtlinie**
  - Beschränkungen, materiell-rechtliche 197 f
  - Beschränkungen, verfahrensrechtliche 196 f
  - künftige Bestimmungen 199 f
  - Mitbestimmungsrechte 198
- Sitzverlegung**
  - Internationales Gesellschaftsrecht 152 f
- Smart Contract**
  - Anwendungsgrenzen 48
  - Blockchain 47
- stakeholder value-Ansatz** 390 f, 403
  - Deutscher Corporate Governance Codex (DCGK) 724
  - Einfluss auf Unternehmensinteresse 724 ff
- Stetigkeitsgebot**
  - Bilanzrecht, Grenze der Wahlrechtsausübung 661 f
- Steuerrecht**
  - Familienstiftung 840 ff, *s.a. dort*
- Stiftungsrecht**
  - autonome Willensbildung durch Stiftungsorgane 848 ff
  - Befugnisse der Stiftungsorgane 850 f
  - Destinatärsversammlung 848 f
  - Familiengesellschaft als Stiftungskonstruktion *s. Familienstiftung*
  - fiktive Satzung 847
  - Gemeinnützigkeit 837
  - Governance 859
  - Lebensfähigkeitsvorbehalts 858
  - privatnützige *s. Familienstiftung*
  - Rechtsstellung der Destinatäre 851 f, 856
  - Typendehnung nach Burgard 849 f, 863
  - Verbot der Selbstzweckstiftung 852 ff
  - Virtualisierung der Mitglieder 847 ff



- Vorstand, Kuratorium und Beirat als personales Substrat 848, 859

### stille Beteiligung

- atypisch *s. dort*
- typisch *s. dort*

### théorie institutionnelle

- Emile Gaillard 1932, Aktiengesellschaft und intérêt social 709 ff

### true and fair view-Prinzip 658 ff

### Twitter

- rechtliche Kommunikationsanforderungen 39

### typisch stille Beteiligung 869 f

- Gewinn- und Verlustbeteiligung 870
- Informationsrecht 870
- Innengesellschaft 878
- Innenwirkung 871
- Kapitaleinkünfte 871, 873
- Rechte 870
- Treuepflichten 886

### Übernahmerecht

- Angemessenheit der Gegenleistung 811 ff, *s.a. Angemessenheit der Gegenleistung im Übernahmerecht*
- dem dinglichen Erwerb gleichgestellte schuldrechtliche Vereinbarungen 815, 822 ff
- Erwerb, dinglicher 815
- freiwilliges Übernahmeangebot 814
- Gleichbehandlungsgrundsatz 825
- McKesson/Celesio-Entscheidung 813, 821 ff, 826 ff
- Paketzuschläge 819 f
- Pflichtangebot 813
- Preisfestlegung durch Bieter 822 ff, 832
- Prüfung durch die BaFin 820, 832
- Rechtssicherheit 824 f, 832
- Referenzzeitraum und schuldrechtliche Vereinbarung 815, 822 f, 827
- Schutzinstrument 813
- Spruchverfahren 819
- Umgehungsschutz 822 ff, 832
- unterlassenes Pflichtangebot 816
- Vereinbarungen mit mehraktigen Erwerbsvorgang 821 ff, 832
- Vor-, Parallel- und Nacherwerbe 814 f
- Vorgaben der Übernahme-RL 813 f
- weite Auslegung des Begriffs „Vereinbarung“ 822 ff

### UK Bribery Act

- Lieferketten 24 ff

### UK Modern Slavery Act 2015

- Transparenzregelung für Lieferketten 417 ff
- Ziel 417 ff

### Umwandlung

- grenzüberschreitende 903 ff, *s.a. grenzüberschreitender Formwechsel*

### Umwandlungsgesetz

- Referentenentwurf eines Vierten Gesetzes zur Änderung des Umwandlungsgesetzes *s. dort*

### UN-Flüchtlingskonvention 482

### Unionsrecht

- Kohärenz 153 f, *s.a. Kohärenz im Internationalen Gesellschaftsrecht*

### UN-Kinderrechtskonvention 482

### UN-Leitprinzipien für Wirtschaft und Menschenrechte 282 ff, 302 ff, 311

- access to remedy 284
- corporate responsibility to human right 284, 325
- Deutschland, Nationaler Aktionsplan 447 f
- drei Säulen 325
- Frankreich, Konzernhaftung nach dem Code de Commerce 444 f
- Konkretisierung der Sorgfaltsmaßstäbe 450 f
- Konzept 283
- Legitimation als Rahmenwerk für CSR-Berichterstattung 285 f
- Leitprinzipien 283 ff, 443
- Menschenrechte 480 ff, *s.a. dort*
- menschenrechtliche Sorgfaltspflicht 304 f, *s.a. dort*
- Mutter-Verantwortlichkeit für Menschenrechtsverletzungen 479 ff, 513 f *s.a. dort*
- nationale Umsetzungen 443 ff
- Schweiz, Konzernverantwortungsrichtlinie 445 ff
- state duty to protect human rights 283 f
- übernationaler Sorgfaltsstandard 450 f
- Zumutbarkeitsgrenzen 451

### Unternehmensinteresse

- Berücksichtigung von Nichtaktionärsinteresse, Fallbeispiel VW/Ludwig Erhard 1962 712
- Corporate Social Responsibility-Einfluss 726 ff
- Debatte um das „Unternehmen an sich“ 707
- Einfluss der Finanzkrise 2007/2008 724 f
- Einführung der Begrifflichkeiten in die Spruchpraxis 718 f
- Gemeinwohl, Einfluss der nationalsozialistischer Ideologie 709, 714
- Gemeinwohlklausel, Aktiengesetz 1937 708 f
- intérêt social, vergleichende Dogmen-

- geschichte Frankreich und Deutschland 705 ff, 731 ff, *s.a. intérêt social*
- Mannesmann-Entscheidung 2005 719
- MitbestG 1976 716
- Reform des deutschen Aktienrechts 1965 714
- Shareholder-Value-Einfluss, Anteilseignerinteressen 720
- Stakeholder-Orientierung 724 f
- Walther Rathenau, Grundideen von 1917 706 f
- Unternehmensnachfolge**
  - Familienstiftung 835 ff, *s.a. dort*
- Unternehmerische Entscheidungen des Aufsichtsrats**
  - Abberufung von Vorstandsmitgliedern 540, 543 ff, 581
  - Abberufungsermessen 541 f, 544, 581
  - anerkannte unternehmerische Maßnahmen 533 f
  - Angemessenheit der Informationsgrundlage 554 ff, 582
  - Anwendung der Business Judgment Rule 525 ff, 580 ff
  - Befolgung der Absichtserklärung 553 f, 582
  - Begriff der unternehmerischen Entscheidung 528 ff
  - Beschaffung vorstandsunabhängiger Informationen 563 f
  - bewusste Entscheidung 532 f, 581
  - Entsprechenserklärung, Abgabe der Wis-senserklärung 552, 581 f
  - Entsprechenserklärung, Absichtserklärung 552, 582
  - Expertenrat, Vertrauensgrundsatz 566 ff, 582
  - Festsetzung der Vorstandsvergütung 546 ff, 581
  - Feststellung/Billigung von Jahres-/Kon-zernabschlüssen, Wahlrechte und Ermes-sensspielräume 652 ff
  - Freiheit von Interessenkonflikten 568 ff, 583
  - Funktion des Haftungsprivilegs 527
  - Gutgläubigkeit 579, 583
  - Handeln auf Grundlage angemessener In-formationen 554 ff, 582
  - Handeln auf Grundlage externer Beratung 564 ff
  - Handeln zum Wohl der Gesellschaft 545, 576 ff, 583
  - Herabsetzung der Vorstandsvergütung, Angemessenheit 549 ff, 581
  - Hinzuziehung externer Sachverständiger 565 f
  - Informationsbeschaffungspflicht 558 f
  - Interessenkonflikte 570 ff
  - Kollegialentscheidung bei Interessenkon-flikt 572 ff
  - Kombinationsthese 530 ff
  - Komplexität 531 f, 536, 548, 551
  - Nebenamtscharakter der Tätigkeit 557, 569, 582
  - Prognosecharakter 531 f, 536, 547, 551
  - Rechtsfolgen der Business Judgment Rule 579 f
  - Schaffung eines Zustimmungskatalogs 535 f, 581
  - strukturelles Informationsdefizit 559 f
  - Unabhängigkeitserfordernis 575 ff
  - Unsicherheit 531 f, 536, 548, 551
  - unternehmerischer Charakter 528 ff
  - unternehmerischer Handlungsspielraum 527 f, 543 f, 545, 550 f, 553
  - unternehmerisches Ermessen 525 f, 536 ff
  - Unterrichtung durch den Vorstand 559 ff
  - Vorstandsvergütungsentscheidung 545 ff
  - Zukunftsbezogenheit 531 f, 536, 548, 551
  - Zustimmungserteilung 538 ff, 581
  - zustimmungspflichtige Geschäfte, Informa-tionsgrundlage 561
  - Zustimmungsvorbehalte 535 ff, 581
- VALE-Entscheidung 904 f**
- Vereinsklassenabgrenzung**
  - Abgrenzung wirtschaftlicher und nicht-wirtschaftlicher 2 f, 9 ff, 15 f, 635 ff
  - Durchsetzungsdefizite der vereinsrecht-lichen Rechtsformkontrolle 640 ff
  - Gegenstand der Vereinstätigkeit 9, 12, 16
  - Gemeinnützigkeitsindiz als rechtwegfrem-des Instrument 638 f, 645
  - Gemeinnützigkeitsrecht, Wertungsvergleich 10, 638 f
  - Geschäftsbetrieb 3 ff, *s.a. dort*
  - Gesetzesgeschichte 10 ff
  - Gesetzeswortlaut 12
  - Idealziel als Endzweck 8
  - Kita-Rechtsprechung 633 ff
  - Kommerzialisierbarkeit ideeller Güter 8, 15 f
  - kommerzielle und nichtkommerzielle Ver-einigungen nach dem Entwurf eines „Ge-setzes betreffend die privatrechtliche Stel-lung von Vereinen 6 f
  - Konzessionierung 640, 643 f
  - Maßgeblichkeit der Wirtschaftsweise 13
  - Nebentätigkeitsprivileg 636, 637, 644
  - Nebenzweckprivileg 634, 637 f, 645
  - objektive Theorie 2 f

- Rechtsfähigkeit 639 ff
- Rechtsformkontrolle 639 ff, 646
- Sachziel 9, 15 f
- subjektiv/objektive Theorie 2 f, 637 ff
- subjektive Theorie 2 f
- systemkonforme 639 ff
- teleologisch-typologische Theorie 635 ff, 645
- Theorienstreit 2 f
- typologische Theorie 3, 635 ff
- Wirtschaftlichkeit 6 ff, 634 f
- Zweck 3 ff, 8 ff, 12, 634 ff
- Zweckverwirklichungsbetrieb 8
- Vereinsrecht**
  - ausländisches 15
  - Geschäftsbetrieb 3 ff, *s.a. dort*
  - Grundordnung 1 ff
  - Kita-Rechtsprechung 3, 8, 16, 633 ff
  - Ordnung der Tatbestandsmerkmale 3 ff
  - Österreich, Rechtslage 14
  - Rechtsformkontrolle 639 ff
  - Schweiz, Rechtslage 14
  - Vereinsklassenabgrenzung *s. dort*
- Vergütungsparameter**
  - CSR, nichtfinanzielle Anreize für Vorstand und Aufsichtsrat 379 ff, *s.a. CSR-Vergütungsparameter, nichtfinanzielle*
- Verrichtungsgehilfe**
  - Konzerndeliktshaftung, Figur des konkreten Verrichtungsgehilfen 491 ff
  - Konzernunternehmen, Mutter und -Tochterverhältnis 489 ff
- Verschmelzung**
  - grenzüberschreitende 906 ff, *s.a. dort*
  - Verschmelzungsrichtlinie 906
- Vertretungsmacht**
  - organschaftliche *s. dort*
- vorinsolvenzliches Sanierungsverfahren** *s. Sanierung nach geplanter EU-Restrukturierungs-Richtlinie und Restrukturierungsverfahren*
- Vorstand**
  - Aufstellung von Jahres-/Konzernabschlüssen, Wahlrechte und Ermessensspielräume 652
  - Berichtspflicht 235 f
  - Bilanzierungsentscheidungen *s. Bilanzrecht*
  - Business Judgment Rule, Anwendung bei Aufstellung von Jahres-/Konzernabschlüssen 653

- CSR-Berichtspflicht 235 f
- CSR-bezogene Einzeltätigkeiten 236 f
- CSR-Konzept, Ermessensreduzierung 237 f
- CSR-Pflichten und Business Judgment Rule 237
- Delegationsfähigkeit und -verbot CSR-bezogener Pflichten 238 f
- ethisches Verhalten 339 ff, 346 ff *s.a. Geschäftsleiterpflichten und CSR-Belange*
- Expertenrat, Vertrauensgrundsatz 566 ff
- Gemeinwohlbelange, Berücksichtigung 341 ff, 375 ff, *s.a. Geschäftsleiterpflichten und CSR-Belange*
- nichtfinanzielle Vergütungsparameter für CSR-Ausrichtung 380 ff, 396 ff, *s.a. CSR-Vergütungsparameter, nichtfinanzielle*
- Unterrichtungspflicht gegenüber Aufsichtsrat 559 ff
- virtuelle Sitzung 30
- Vorstandsvergütung**
  - Festsetzung 546 ff, 581
  - Herabsetzung 549 ff, 581
  - unternehmerische Entscheidung des Aufsichtsrats 545 ff
- Wandelanleihe**
  - Berechnung der Gegenleistung im Übernahmerecht 829 f
  - McKesson/Celesio-Entscheidung 813, 821 ff
  - Vereinbarung zum derivativen Erwerb im Übernahmerecht 823, 832
- Webtracking-Tools** 34, 37
- Wirtschaftsverein** 3 ff, 12 f, 634 f, *s.a. Vereinsklassenabgrenzung*
- Rechtsformkontrolle 639 ff
- wrongful trading** 509
- Youtube**
  - rechtliche Kommunikationsanforderungen 39
- Zustimmungsvorbehalte**
  - Ermessensschränken 537
  - Schaffung eines Zustimmungskatalogs 535 f, 581
  - unternehmerische Entscheidung des Aufsichtsrats 536 f
  - Zustimmungserteilung 538 ff, 581
